# Supplementary material for: The RNF20/40 complex regulates p53-dependent gene transcription and mRNA splicing
Source: PubMed Central journal article supplement (PMC7109600; doi:10.1093/jmcb/mjz045), 2019-06-01
Supplement: supplemental_information-20190425_mjz045.pdf [file supplemental_information-20190425_mjz045.pdf]

# Supplementary Material

## The RNF20/40 complex regulates p53-dependent gene transcription and mRNA splicing

Chen Wu<sup>1,2</sup>, Yaqi Cui<sup>1,2</sup>, Xiuhua Liu<sup>1</sup>, Feng Zhang<sup>3</sup>, Lin-Yu Lu<sup>4,5</sup>, and Xiaochun Yu<sup>2,\*</sup>

<sup>1</sup>College of Life Sciences, Hebei University, Baoding, 071000, Hebei, PR China

<sup>2</sup>Department of Cancer Genetics and Epigenetics, Beckman Research Institute, City of Hope, 1500 E. Duarte Rd, Duarte, California, 91010, USA

<sup>3</sup>College of Life and Environment Sciences, Shanghai Normal University, Shanghai, China

<sup>4</sup>Key Laboratory of Reproductive Genetics, Ministry of Education and Women's Reproductive Health Laboratory of Zhejiang Province, Women's Hospital, School of Medicine, Zhejiang University, Hangzhou, Zhejiang, China.

<sup>5</sup>Institute of Translational Medicine, Zhejiang University, Hangzhou, Zhejiang, China.

Correspondence should be addressed to: Xiaochun Yu ([xyu@coh.org](mailto:xyu@coh.org))

**Content:**

I. Supplementary Figures .....4

    Supplementary Figure S1. p53 was expressed and tightly associated with genomic DNA in response to DNA damage. ....4

    Supplementary Figure S2. Exogenous and endogenous p53 expression in HCT116 and K562 cells. ....5

    Supplementary Figure S3. p53 interacts with RNF20 and RNF40.....6

    Supplementary Figure S4. Wild type p53 or the D5 mutant was expressed in HCT116 p53 -/- cells. ....7

    Supplementary Figure S5. p53 mediates the recruitment of the RNF20/40 complex to the promoter region at *p21* loci in response to MMS treatment. ....8

    Supplementary Figure S6. p53 mediates the recruitment of the RNF20/40 complex to the promoter region of *p21*. ....10

    Supplementary Figure S7. p53 mediates the recruitment of the RNF20/40 complex to the promoter region at *PUMA* loci in HCT116 cells. ....12

    Supplementary Figure S8. The RNF20/40 complex regulates *p21* pre-mRNA maturation in response to DNA damage. ....14

    Supplementary Figure S9. The RNF20/40 complex regulates *PUMA* pre-mRNA maturation. ....16

    Supplementary Figure S10. ubH2B mediates the recruitment of PRPF8 for the pre-mRNA processing of *PUMA* in HCT116 cells.....17

    Supplementary Figure S11. PRPF8 impairs the pre-mRNA processing of *p21* in HCT116 cells. ....19

    Supplementary Figure S12. DHX8 impairs the pre-mRNA processing of *p21* in HCT116 cells. ....21

II. Supplementary tables.....23

    Supplementary Table S1. Affinity purification and mass spectrometry analysis of p53 in HCT116 cell.....23

    Supplementary Table S2. Affinity purification and mass spectrometry analysis of p53 in K562 cell.....30

    Supplementary Table S3. Primer sequences for ChIP-qPCR analysis of the *p21* locus.....34

    Supplementary Table S4. Primer sequences for ChIP-qPCR analysis of the *PUMA* locus. .34

    Supplementary Table S5. Primer sequences for RT-PCR analysis of *p21* mature and pre-mRNA expression. ....35

Supplementary Table S6. Primer sequences for RT-PCR analysis of *PUMA* mature and pre-mRNA expression. ....35

## I. Supplementary Figures

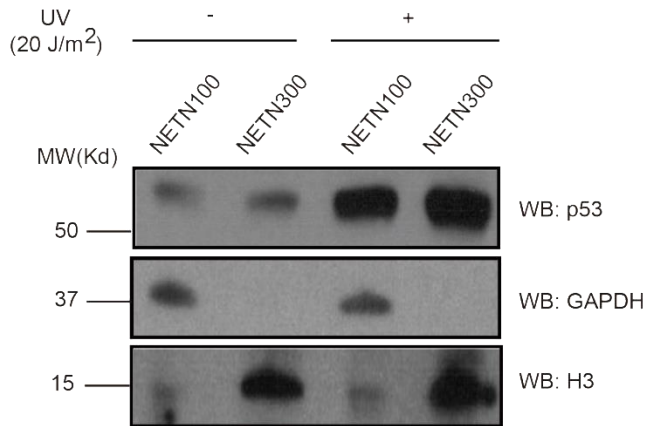

### **Supplementary Figure S1. p53 was expressed and tightly associated with genomic DNA in response to DNA damage.**

HCT116 cells were treated with or without UV-C (20 J/m<sup>2</sup>). After 8h, cells were lysed by NETN100 (lysis buffer with 100 mM NaCl) to obtain the soluble fraction. The pellets were further treated with NETN300 (lysis buffer with 300 mM NaCl) and 250 Units benzonase to extract the chromatin fraction. Both fractions were examined by Western blotting. GAPDH and histone H3 were used as a loading control for each fraction.

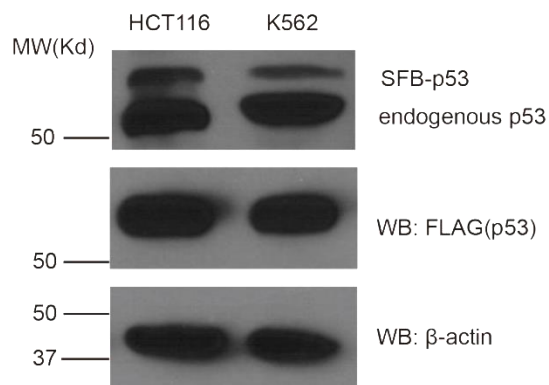

**Supplementary Figure S2. Exogenous and endogenous p53 expression in HCT116 and K562 cells.**

HCT116 and K562 cells were transfected stably with SFB-p53 plasmid. Following UV-C (20 J/m<sup>2</sup>), the expression levels of exogenous p53 and endogenous wild-type p53 in both K562 and HCT116 were determined by Western blot with anti-p53 antibody. Cells were lysed in NETN300 buffer.  $\beta$ -actin was used as the protein loading control.

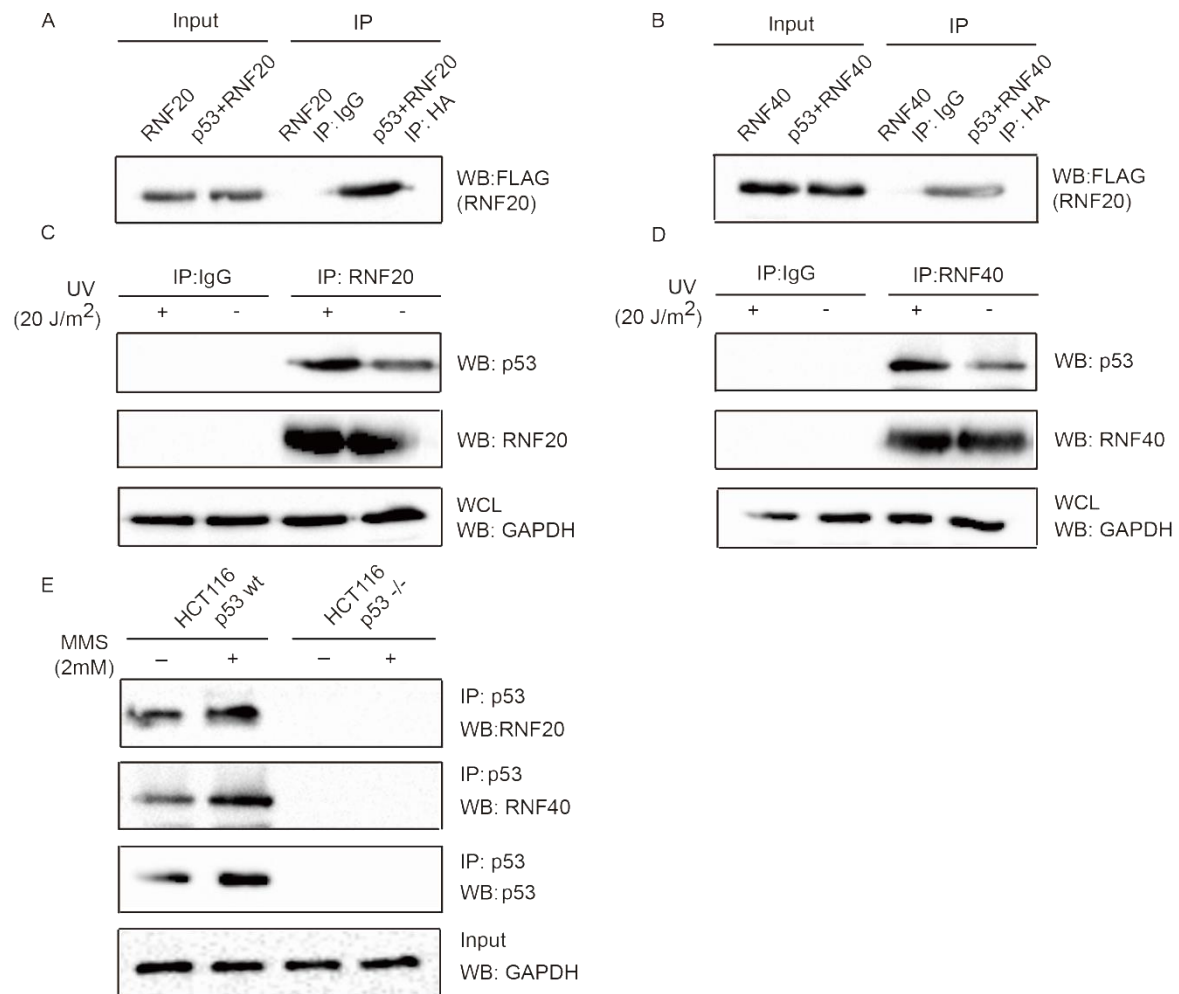

### Supplementary Figure S3. p53 interacts with RNF20 and RNF40.

HCT116 cells were transfected with HA-p53 and SFB-RNF20 or SFB-RNF20 (A) or HA-p53 and SFB-RNF40 or SFB-RNF40 (B). Cells were lysed with NETN300 buffer. Cell extracts were examined by IP and Western blot with indicated antibodies using unspecific IgG as a negative control. (C and D) p53 associates with endogenous RNF20/40. HCT116 cells were treated with UV-C (20 J/m<sup>2</sup>). After 8 hours recovery, cells were lysed with NETN300 buffer, and lysates were examined by IP and Western blot with indicated antibodies. GAPDH was used as the protein loading controls. (E) p53<sup>-/-</sup> HCT116 cells were used to as a negative control to confirm the specificity of IP of p53 protein.

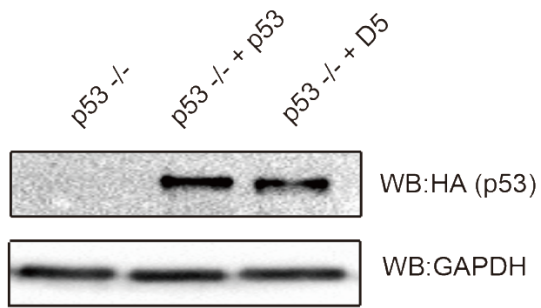

**Supplementary Figure S4. Wild type p53 or the D5 mutant was expressed in HCT116 p53<sup>-/-</sup> cells.**

The expression was examined by Western blot.

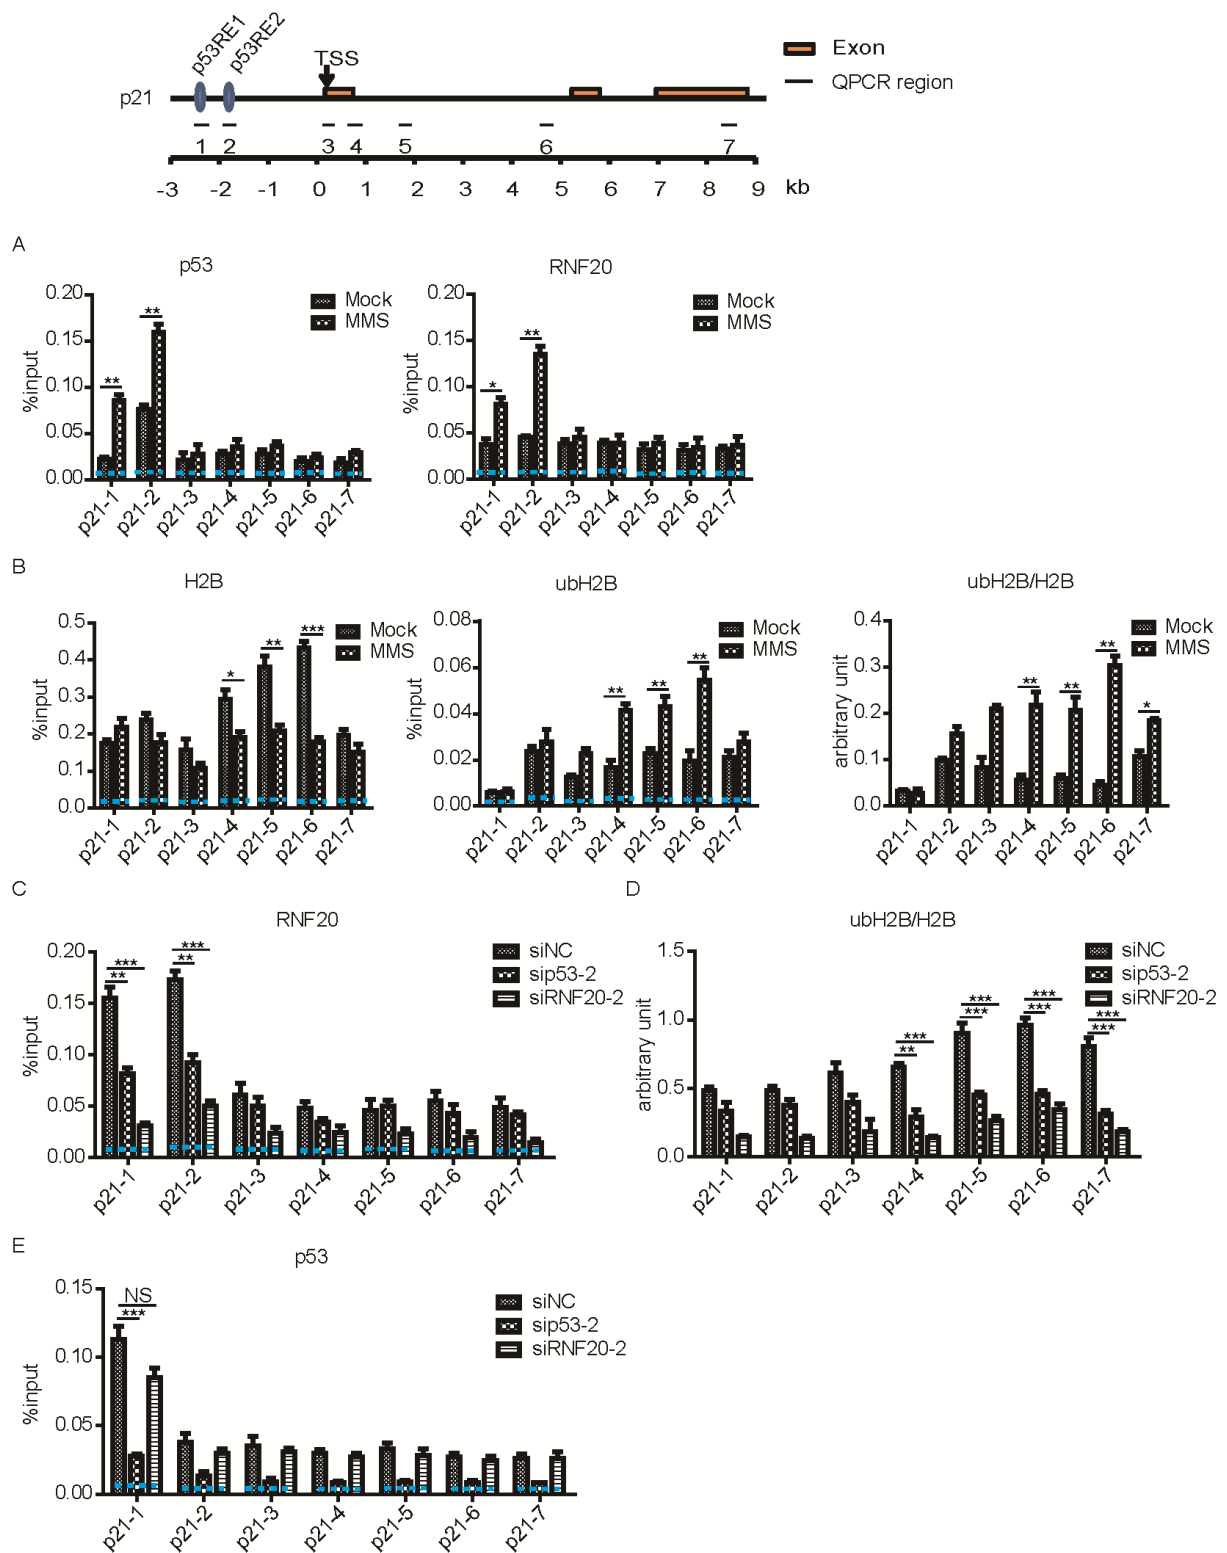

**Supplementary Figure S5. p53 mediates the recruitment of the RNF20/40 complex to the promoter region at *p21* loci in response to MMS treatment.**



(A) DNA damage induces p53 and RNF20 to the *p21* gene promoter region. HCT116 cells were treated with or without 2mM MMS. After one hour, ChIP analyses on the *p21* locus were performed using anti-p53 and anti-RNF20 antibodies. An irrelevant IgG was used for a control shown as the dotted lines. Primers of *p21* used for q-PCR are included in Table S3.

(B) ubH2B was enriched at the *p21* gene body region in response to MMS. ChIP analyses of H2B and ubH2B/H2B were included. (C) p53 mediates the recruitment of RNF20 at the promoter region of *p21*. HCT116 cells were transfected with another control siRNA (siNC), p53 siRNA and RNF20 siRNA respectively. ChIP analyses on the *p21* locus were performed. (D) Both p53 and RNF20 regulate ubH2B at the gene body region of *p21*. (E) RNF20 is not required for the recruitment of p53. Data are represented as mean  $\pm$  SD as indicated from three independent experiments. N.S.: Non Significant; \*: Statistically Significant ( $p < 0.05$ ); \*\*: Statistically Significant ( $p < 0.01$ ); \*\*\*: Statistically Significant ( $p < 0.001$ ).

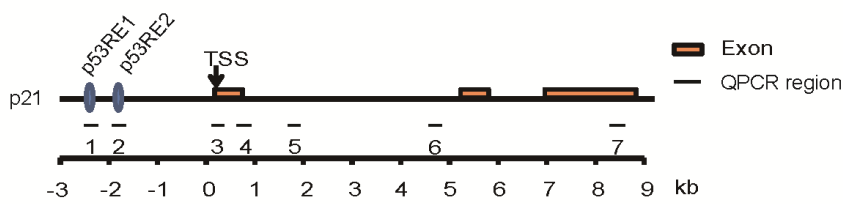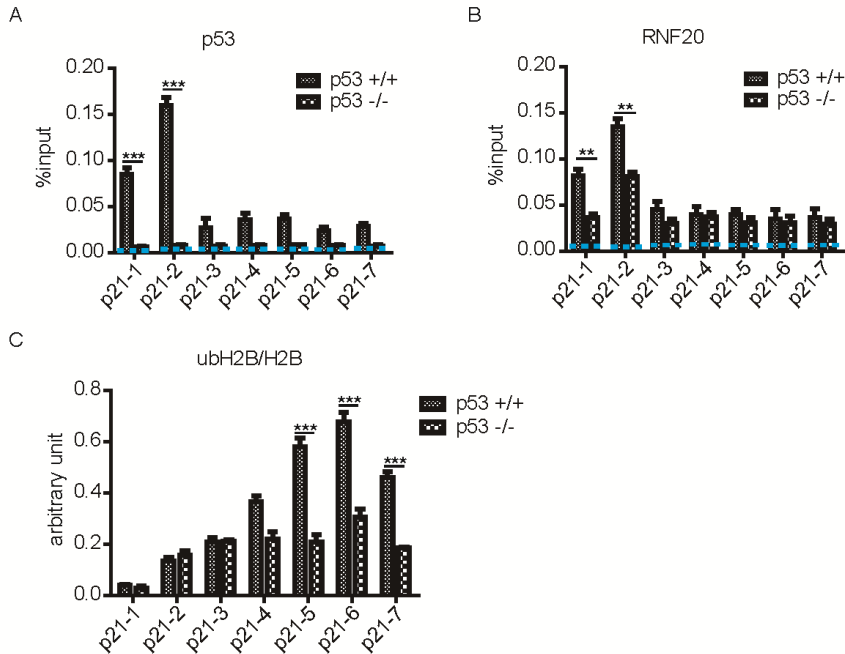

**Supplementary Figure S6. p53 mediates the recruitment of the RNF20/40 complex to the promoter region of *p21*.**

p53 <sup>-/-</sup> HCT116 cells were performed by ChIP assay as a negative control for p53 <sup>+/+</sup> HCT116.

DNA damage induces p53 and RNF20 to the *p21* gene promoter region. HCT116 cells were treated with or without 2mM MMS. After one hour, ChIP analyses on the *p21* locus were performed using anti-p53 (A) or anti-RNF20 (B) antibodies. An irrelevant IgG was used for a negative control shown as the dotted lines. Q-PCR amplification regions are indicated in the schematic diagram. The sequences of each primer are shown in Supplemental Table S3. (C) ubH2B was enriched at the *p21* gene body region in response to DNA damage. ChIP analyses were performed with anti-ubH2B and anti-H2B antibodies. The relative enrichment of ubH2B was examined by the relative ratio of ubH2B vs H2B. Data are represented as mean  $\pm$  SD as

indicated from three independent experiments. Significance of differences was evaluated by Student's t test. N.S.: Non-Significant; \*: Statistically Significant ( $p < 0.05$ ); \*\*: Statistically Significant ( $p < 0.01$ ); \*\*\*: Statistically Significant ( $p < 0.001$ ).

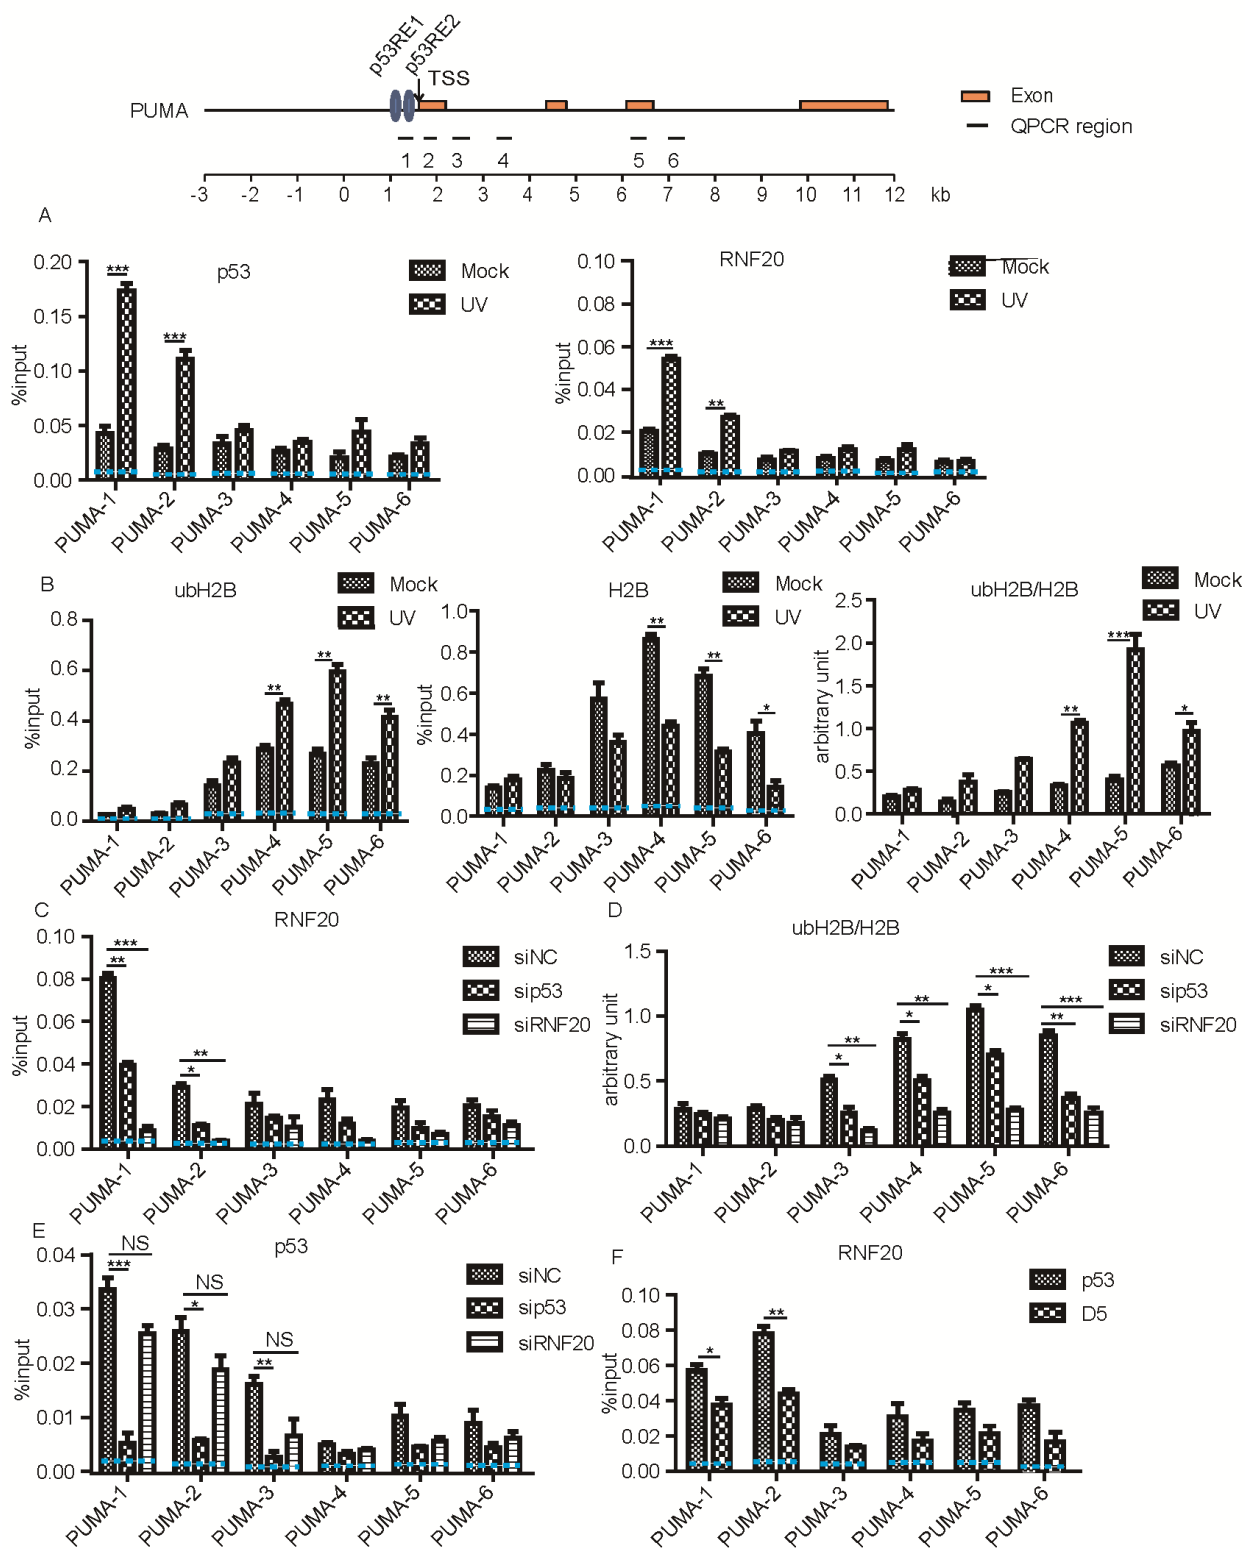

**Supplementary Figure S7. p53 mediates the recruitment of the RNF20/40 complex to the promoter region at *PUMA* loci in HCT116 cells.**

(A) DNA damage induces p53 and RNF20 to the *PUMA* gene promoter region. HCT116 cells were treated with or without UV-C (20 J/m<sup>2</sup>). After 8 hours recovery, ChIP analyses on the *PUMA* locus were performed using anti-p53 and anti-RNF20 antibodies. An irrelevant IgG was used for a control shown as the dotted lines. Primers of *PUMA* used for q-PCR are included in Table S4. (B) ubH2B was enriched at the *PUMA* gene body region in response to DNA damage. ChIP analyses of H2B and ubH2B/H2B were included. (C) P53 mediates the recruitment of RNF20 at the promoter region of *PUMA*. HCT116 cells were transfected with control siRNA (siNC), p53 siRNA and RNF20 siRNA respectively. ChIP analyses on the *PUMA* locus were performed. (D) Both p53 and RNF20 regulate ubH2B at the gene body region of *PUMA*. (E) RNF20 is not required for the recruitment of p53. (F) The CTD of p53 is required for the recruitment of RNF20. Full length p53 and the D5 mutant were expressed in HCT116 p53<sup>-/-</sup> cells. ChIP analyses on RNF20 were performed. Data are represented as mean  $\pm$  SD as indicated from three independent experiments. N.S.: Non Significant; \*: Statistically Significant ( $p < 0.05$ ); \*\*: Statistically Significant ( $p < 0.01$ ); \*\*\*: Statistically Significant ( $p < 0.001$ ).

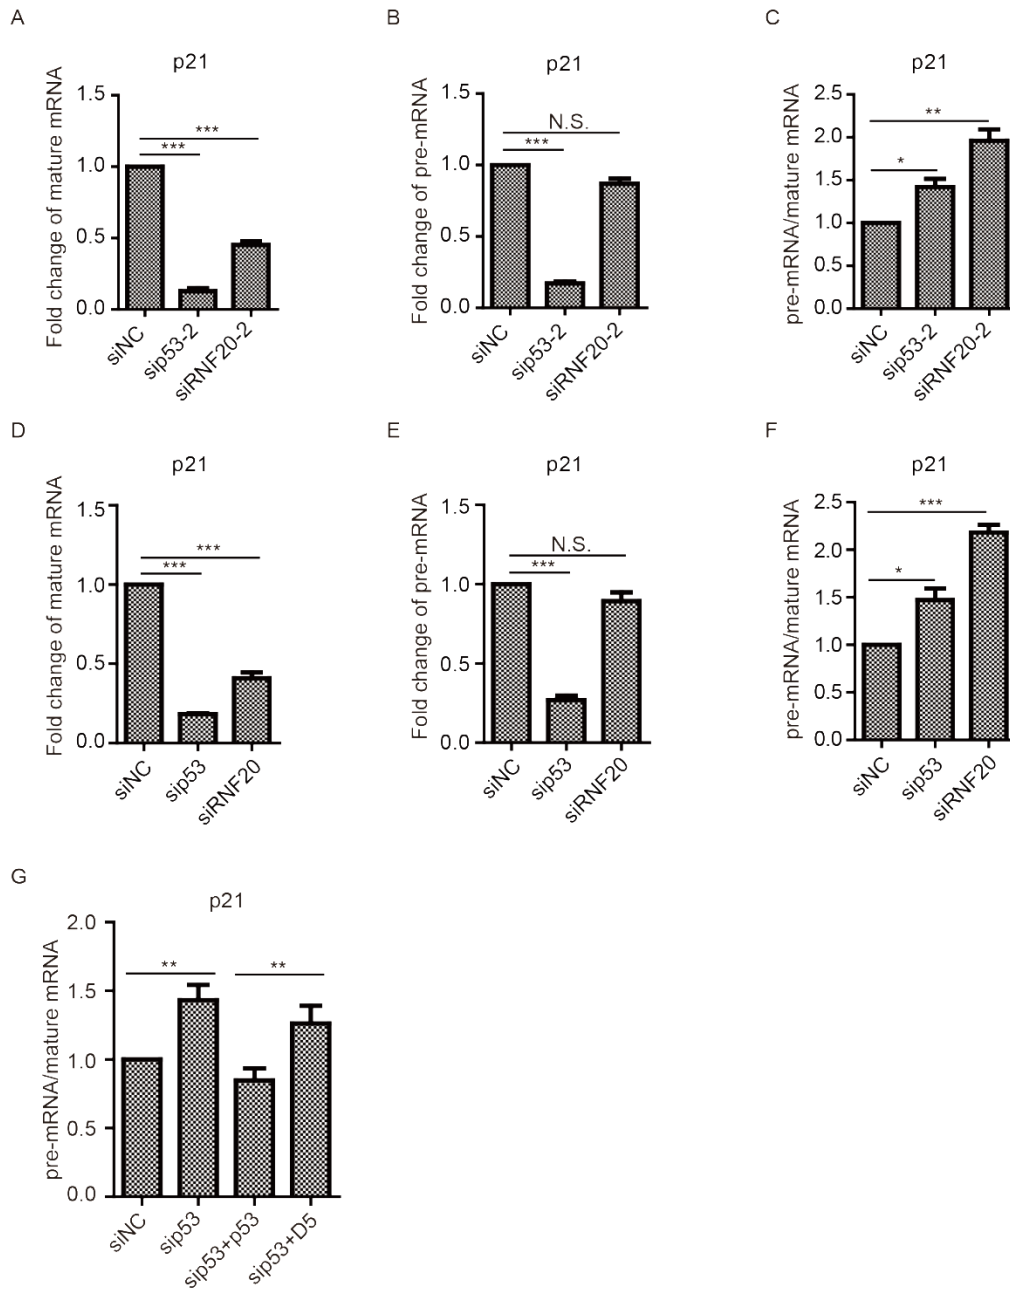

**Supplementary Figure S8. The RNF20/40 complex regulates *p21* pre-mRNA maturation in response to DNA damage.**

HCT116 cells were transfected with the indicated another siRNA followed by UV-C (20 J/m<sup>2</sup>). After 8 hours, mature mRNA(A) and pre-mRNA(B) of *p21* were examined by q-PCR. (C) RNF20 plays an important role in *p21* pre-mRNA processing in response to UV treatment. The fold changes of pre-mRNA vs. mature mRNA were compared. Lacking RNF20 induces

relatively increased pre-mRNA of *p21* in HCT116 cells. We did the same assay followed by 2mM MMS in replacement of UV treatment. After 1 hours, mature mRNA(C) and pre-mRNA. (D) of *p21* were examined by q-PCR. (E) RNF20 plays an important role in *p21* pre-mRNA and mature mRNA(F) processing in response to MMS treatment. (G) The CTD mutation (D5) of p53 affects mRNA splicing of *p21*. The primer sequences for q-PCR at *p21* loci have been included in Supplemental Table S5. Data are represented as mean  $\pm$ SD as indicated from three independent experiments. N.S.: Non-Significant; \*: Statistically Significant ( $p < 0.05$ ); \*\*: Statistically Significant ( $p < 0.01$ ); \*\*\*: Statistically Significant ( $p < 0.001$ ).

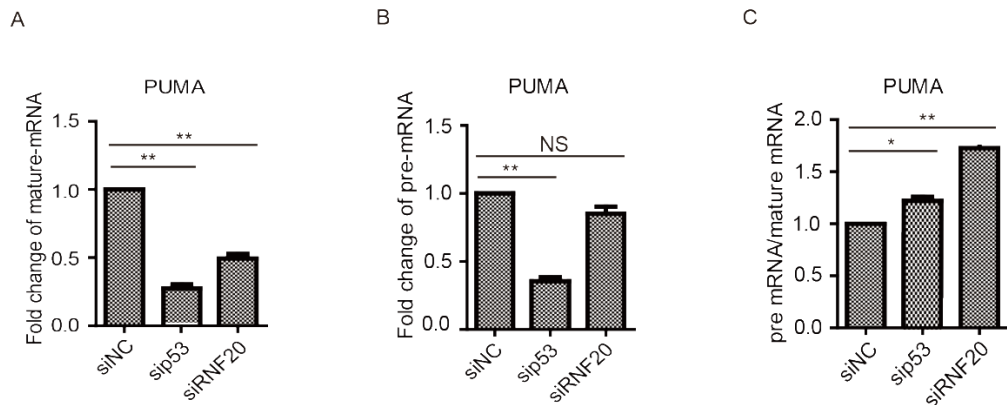

**Supplementary Figure S9. The RNF20/40 complex regulates *PUMA* pre-mRNA maturation.**

HCT116 cells were transfected with the indicated siRNA followed by UV-C (20 J/m<sup>2</sup>). After 8 hours recovery, mature mRNA (A) and pre-mRNA (B) of *PUMA* were examined by q-PCR. (C) RNF20 plays an important role in *PUMA* pre-mRNA processing in HCT116 cells. The fold changes of pre-mRNA vs. mature mRNA were compared. Lacking RNF20 induces relatively increased pre-mRNA of *PUMA* in HCT116 cells. The primer sequences for q-PCR at *PUMA* loci have been included in Supplemental Table S6. Data are represented as mean ± SD as indicated from three independent experiments. *N.S.*: Non-Significant; \*: Statistically Significant ( $p < 0.05$ ); \*\*: Statistically Significant ( $p < 0.01$ ); \*\*\*: Statistically Significant ( $p < 0.001$ ).



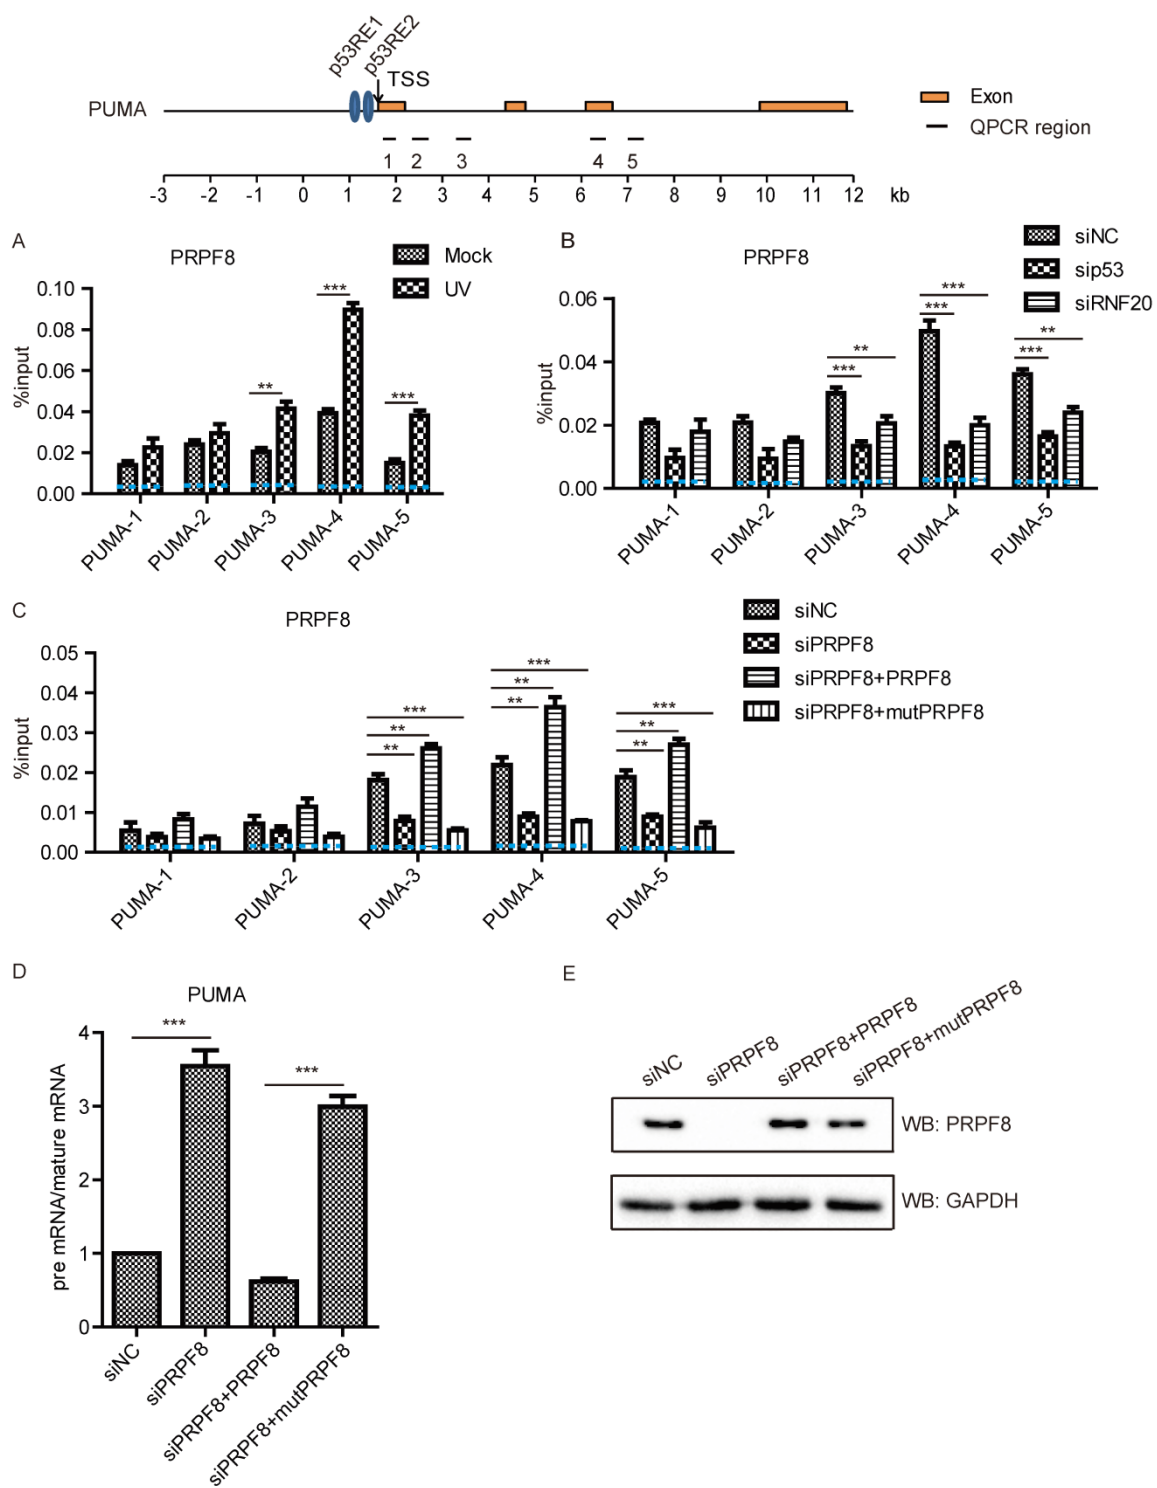

**Supplementary Figure S10. ubH2B mediates the recruitment of PRPF8 for the pre-mRNA processing of *PUMA* in HCT116 cells.**

(A) PRPF8 is recruited to the gene body of *PUMA* upon DNA damage. HCT116 cells were treated with or without UV-C (20J/m<sup>2</sup>). ChIP analyses at the *PUMA* locus were performed using anti-PRPF8 antibodies. An irrelevant IgG was used for negative control presented as the dotted lines. Primers used for q-PCR are included in Supplemental Table S4. (B) Downregulation of p53 or the RNF20/40 complex by siRNA impairs the enrichment of PRPF8 at the gene body region of *PUMA* in HCT116 cells. (C) The I2105A/I2106A mutant of PRPF8 (mutPRPF8) impairs the enrichment of PRPF8 at the gene body region of *PUMA*. (D) MutPRPF8 impairs the pre-mRNA processing of *PUMA*. HCT116 cells were treated with indicated siRNA. Full length PRPF8 or mutPRPF8 were re-introduced into the cells. The cells were treated with UV-C (20 J/m<sup>2</sup>). The relative changes of pre-mRNA vs. mature mRNA of *PUMA* were examined by q-PCR. The primer sequences have been included in Supplemental Table S6. (E) The expressions of PRPF8 and mutant PRPF8 were examined by western blot. Data are represented as mean  $\pm$  SD as indicated from three independent experiments. \*: Statistically Significant ( $p < 0.05$ ); \*\*: Statistically Significant ( $p < 0.01$ ); \*\*\*: Statistically Significant ( $p < 0.001$ ).

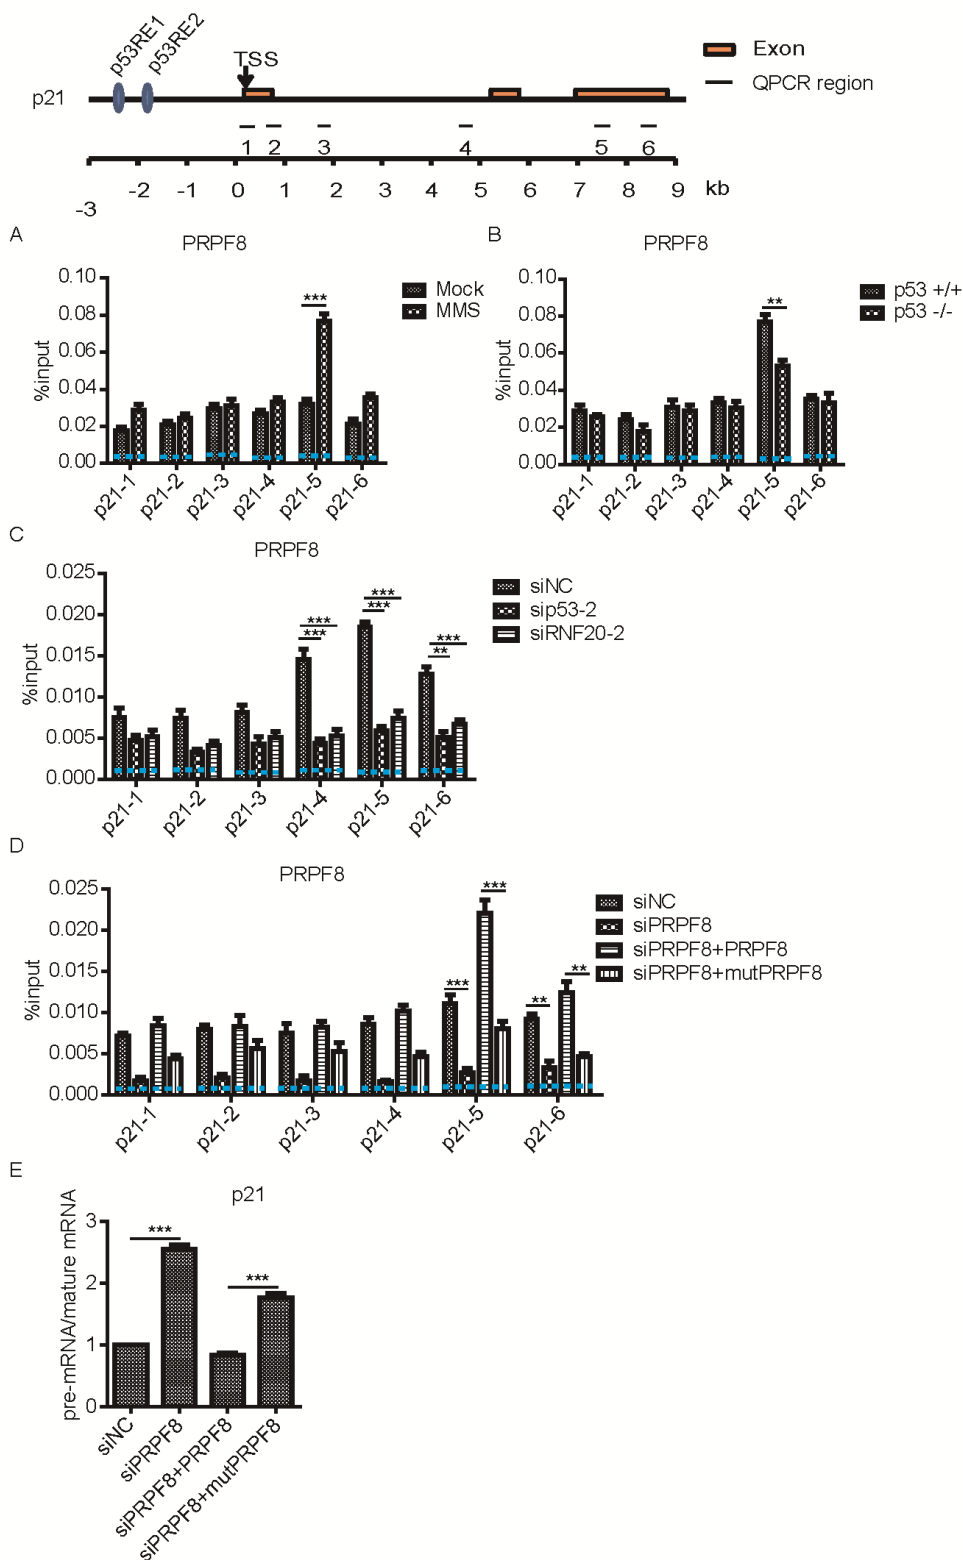

**Supplementary Figure S11. PRPF8 impairs the pre-mRNA processing of *p21* in HCT116 cells.**

(A) PRPF8 is recruited to the gene body of *p21* upon MMS induced DNA damage. HCT116

cells were treated with or without 2 mM MMS. ChIP analyses at the *p21* locus were performed using anti-PRPF8 antibodies. An irrelevant IgG was used for negative control presented as the dotted lines. Primers used for q-PCR are included in Supplemental Table S3. (B) *p53*<sup>-/-</sup> HCT116 cells were used in ChIP assay as a control for *p53*<sup>+/+</sup> HCT116. (C) Downregulation of *p53* or the RNF20/40 complex by another siRNA impairs the enrichment of PRPF8 at the gene body region of *p21* in HCT116 cells. (D) The I2105A/I2106A mutant of PRPF8 (mutPRPF8) impairs the enrichment of PRPF8 at the gene body region of *p21* in response to MMS. (E) MutPRPF8 impairs the pre-mRNA processing of *p21*. HCT116 cells were treated with indicated siRNA. Full length PRPF8 or mutPRPF8 were re-introduced into the cells. The cells were treated with 2 mM MMS. The relative changes of pre-mRNA vs. mature mRNA of *p21* were examined by q-PCR. The primer sequences have been included in Supplemental Table S5. Data are represented as mean  $\pm$  SD as indicated from three independent experiments. \*: Statistically Significant ( $p < 0.05$ ); \*\*: Statistically Significant ( $p < 0.01$ ); \*\*\*: Statistically Significant ( $p < 0.001$ ).

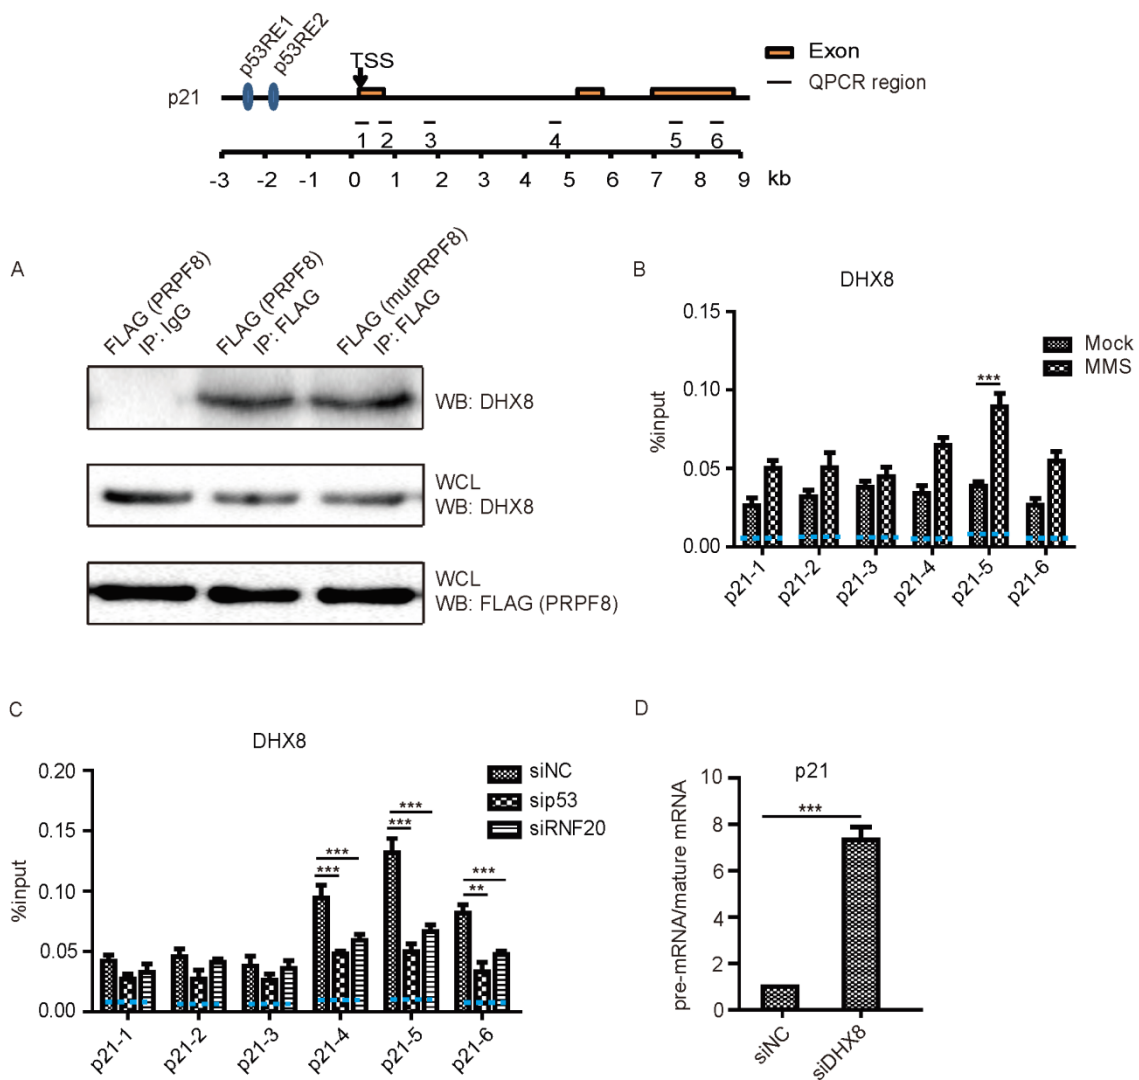

**Supplementary Figure S12. DHX8 impairs the pre-mRNA processing of *p21* in HCT116 cells.**

(A) Both of PRPF8 and mutPRPF8 associate with endogenous DHX8. HCT116 cells were transfected with FLAG-PRPF8 or FLAG-mut PRPF8. Cells were lysed with NETN300 buffer. Cell extracts were examined by Co-IP and Western blot with indicated antibodies using unspecific IgG as a negative control. (B) DHX8 is recruited to the gene body of *p21* upon DNA damage. HCT116 cells were treated with or without 2mM MMS. ChIP analyses at the *p21* locus were performed using anti-DHX8 antibodies. An irrelevant IgG was used for

negative control presented as the dotted lines. Primers used for q-PCR are included in Supplemental Table S3. (C) Downregulation of p53 or the RNF20/40 complex by siRNA impairs the enrichment of DHX8 at the gene body region of *p21* in HCT116 cells. (D) DHX8 impairs the pre-mRNA processing of *p21*. HCT116 cells were treated with indicated siRNA. The cells were treated with 2mM MMS. The relative changes of pre-mRNA vs. mature mRNA of *p21* were examined by q-PCR. The primer sequences have been included in Supplemental Table S5. Data are represented as mean  $\pm$ SD as indicated from three independent experiments. \*: Statistically Significant ( $p < 0.05$ ); \*\*: Statistically Significant ( $p < 0.01$ ); \*\*\*: Statistically Significant ( $p < 0.001$ ). (D) Both of PRPF8 and mutPRPF8 associate with endogenous DHX8. cells were lyzed with NETN300 buffer, and lysates were examined by IP and Western blot with indicated antibodies. GAPDH was used as the protein loading controls.

## II. Supplementary tables

### Supplementary Table S1. Affinity purification and mass spectrometry analysis of p53 in HCT116 cell.

GYGI LAB / TAPLIN BIOLOGICAL MASS SPEC FACILITY [SearchWiz](#) | [Status](#) | [Browse](#)  
 /home/www/production/html/saved\_sets/12870.2.sumlist  
 406 peptides, 94 proteins Charge states: 1+  2+  3+  4+  Sort: Reference desc  html  text  dta Peptides Reload

12870.2 Lookup  scan1  scan1  
 peptide  reference  
 Group 2/3+  
 Use best ion

R:  H:  Sequence:  XCorr 1+  Rank (1 to n):   
 R:  H:  Peptide type: tryptic XCorr 2+  Low PPM1:   
 R:  H:  AA type: acidic XCorr 3+  High PPM1:   
 R:  H:  Mod AA type: acidic XCorr 4+  Low CalPPM:   
 dCn:  High CalPPM:   
 dCn2:  Vista Score:   
 Hide duplicate peptides

| Protein matches  | scanf             | Rank | charge | Ions | dCn    | dCn2   | XCorr  | Reference | Redu Peptide    |                              |
|------------------|-------------------|------|--------|------|--------|--------|--------|-----------|-----------------|------------------------------|
| 67 67 3.754 0.00 | UPSP:PARC_HUMAN   | 2686 | 1      | 2    | 24/36  | 0.5097 | 0.5097 | 5.1340    | UPSP:PARC_HUMAN | 6 K.ELFIEDPSPAISILVLSR.C     |
| 58 58 3.512 0.00 | UPSP:CUL7_HUMAN   | 1892 | 1      | 2    | 24/26  | 0.3775 | 0.3775 | 5.2095    | UPSP:PARC_HUMAN | 6 K.FNQTEFVSVETLLK.D         |
| 43 43 3.632 0.00 | UPSP:COAL_HUMAN   | 2774 | 1      | 3    | 36/132 | 0.6037 | 0.6037 | 5.4201    | UPSP:PARC_HUMAN | 4 K.GAGATVLGTAFPSWDWNPM*J    |
| 20 20 3.226 0.00 | UPSP:P53_HUMAN    | 0826 | 1      | 2    | 21/28  | 0.3057 | 0.3057 | 3.0963    | UPSP:PARC_HUMAN | 5 K.GLQHEPAGVYSGSFR.D        |
| 13 13 3.805 0.00 | UPSP:BRE1A_HUMAN  | 1913 | 1      | 2    | 11/12  | 0.0615 | 0.0615 | 2.0079    | UPSP:PARC_HUMAN | 5 K.LLFSLVK.R                |
| 11 11 3.989 0.00 | UPSP:MCCC2_HUMAN  | 0474 | 1      | 2    | 11/12  | 0.1001 | 0.1001 | 2.5396    | UPSP:PARC_HUMAN | 5 K.I.YEHLQ.RA               |
| 11 11 3.595 0.00 | UPSP:NUCL_HUMAN   | 1758 | 1      | 2    | 23/32  | 0.3173 | 0.3173 | 5.0465    | UPSP:PARC_HUMAN | 5 K.M*LAVASSSEIPTFTVTR.D     |
| 8 8 4.158 0.00   | UPSP:MCCA_HUMAN   | 0551 | 1      | 2    | 22/24  | 0.3530 | 0.3530 | 4.2118    | UPSP:PARC_HUMAN | 5 K.M*LAVALASSSEIPTFTVTR.D   |
| 8 8 3.784 0.00   | UPSP:BRE1B_HUMAN  | 1589 | 1      | 2    | 22/24  | 0.4172 | 0.4172 | 4.9854    | UPSP:PARC_HUMAN | 4 K.M*LVLLTNQVGEK.M          |
| 7 7 3.410 0.00   | UPSP:FBXW8_HUMAN  | 0768 | 1      | 2    | 13/14  | 0.3182 | 0.3182 | 2.6531    | UPSP:PARC_HUMAN | 4 K.M*VVVQALR.L              |
| 6 6 3.861 0.00   | UPSP:PYC_HUMAN    | 1947 | 1      | 2    | 23/32  | 0.5213 | 0.5213 | 4.7461    | UPSP:PARC_HUMAN | 5 K.MLAVASSSEIPTFTVTR.D      |
| 6 6 3.557 0.00   | UPSP:HNRPU_HUMAN  | 1897 | 1      | 2    | 21/24  | 0.4335 | 0.4335 | 4.7777    | UPSP:PARC_HUMAN | 4 K.MLVLLTNQVGEK.M           |
| 6 6 2.892 0.00   | UPSP:RS2_HUMAN    | 1094 | 1      | 2    | 14/14  | 0.0998 | 0.0998 | 1.9294    | UPSP:PARC_HUMAN | 4 K.MVVVQALR.L               |
| 5 5 4.181 0.00   | UPTR:Q59FY4_HUMAN | 0652 | 1      | 2    | 14/16  | 0.1137 | 0.1137 | 2.3118    | UPSP:PARC_HUMAN | 3 K.NLDELTEK.A               |
| 5 5 4.027 0.00   | UPSP:HSP7C_HUMAN  | 2270 | 1      | 3    | 27/56  | 0.3364 | 0.3364 | 3.9926    | UPSP:PARC_HUMAN | 6 K.QILHVSTVQM*WLLK.F        |
| 5 5 3.912 0.00   | UPSP:RLA0_HUMAN   | 1956 | 1      | 2    | 13/14  | 0.1423 | 0.1423 | 2.5488    | UPSP:PARC_HUMAN | 5 K.TLLLSVLR.V               |
| 5 5 3.854 0.00   | UPSP:DECR_HUMAN   | 2157 | 1      | 3    | 41/120 | 0.5460 | 0.5460 | 5.7755    | UPSP:PARC_HUMAN | 6 K.TRTEIPM*AQSDFSQLENQLLV.T |
| 5 5 3.635 0.00   | UPSP:RL7A_HUMAN   | 1579 | 1      | 2    | 22/26  | 0.3391 | 0.3391 | 4.5833    | UPSP:PARC_HUMAN | 5 K.TSVLVQOAGLAALK.M         |
| 4 4 4.267 0.00   | UPSP:NPM_HUMAN    | 0896 | 1      | 2    | 18/28  | 0.3943 | 0.3943 | 3.6828    | UPSP:PARC_HUMAN | 6 K.YGLLSNEPSSSSTR.N         |
| 4 4 3.858 0.00   | UPTR:Q72561_HUMAN | 1489 | 1      | 2    | 13/14  | 0.1760 | 0.1760 | 3.1445    | UPSP:PARC_HUMAN | 5 R.AAFM*ALRS                |
| 4 4 3.570 0.00   | UPTR:Q6NXR8_HUMAN | 2036 | 1      | 2    | 27/38  | 0.6230 | 0.6230 | 5.5953    | UPSP:PARC_HUMAN | 5 R.AALETPIIQGDGPELLLR.S     |
| 4 4 3.565 0.00   | UPSP:RL3_HUMAN    | 0709 | 1      | 2    | 10/12  | 0.1102 | 0.1102 | 2.3493    | UPSP:PARC_HUMAN | 6 R.AELQFGK.Q                |
| 3 3 3.674 0.00   | UPTR:Q53HV1_HUMAN | 0908 | 1      | 2    | 14/16  | 0.2005 | 0.2005 | 2.7715    | UPSP:PARC_HUMAN | 6 R.AGSELFGR.A               |
| 3 3 3.646 0.00   | UPSP:PCCB_HUMAN   | 1362 | 1      | 3    | 35/84  | 0.4415 | 0.4415 | 5.2161    | UPSP:PARC_HUMAN | 5 R.AHVLLSLSQQDGIEQHM*DFDS   |
| 3 3 3.580 0.00   | UPSP:HSP71_HUMAN  | 1691 | 1      | 3    | 31/84  | 0.2020 | 0.2020 | 3.3432    | UPSP:PARC_HUMAN | 5 R.AHVLLSLSQQDGIEQHMDFDS    |
| 3 3 3.272 0.00   | UPSP:ECHA_HUMAN   | 0866 | 1      | 2    | 15/20  | 0.2777 | 0.2777 | 2.9497    | UPSP:PARC_HUMAN | 6 R.AIVSSPEVSK.Y             |
| 3 3 3.260 0.00   | UPSP:RL4_HUMAN    | 0777 | 1      | 2    | 11/12  | 0.2084 | 0.2084 | 2.3872    | UPSP:PARC_HUMAN | 5 R.APDFVPR.Y                |
| 3 3 2.985 0.00   | UPSP:RS24_HUMAN   | 1875 | 1      | 3    | 37/84  | 0.3394 | 0.3394 | 3.7283    | UPSP:PARC_HUMAN | 5 R.DPGLDEVAM*GEM*EADVQ      |
| 3 3 2.972 0.00   | UPSP:HI2_HUMAN    | 2448 | 1      | 2    | 28/42  | 0.1611 | 0.1611 | 6.0230    | UPSP:PARC_HUMAN | 5 R.DPGLDEVAM*GEMEADVQAJ     |
| 2 2 4.698 0.00   | UPSP:RL6_HUMAN    | 1040 | 1      | 2    | 21/30  | 0.3137 | 0.3137 | 4.2542    | UPSP:PARC_HUMAN | 5 R.DRSPAPSPVLPSSLR.N        |
| 2 2 4.546 0.00   | UPSP:TBA6_HUMAN   | 1301 | 1      | 3    | 28/48  | 0.3355 | 0.3355 | 3.9003    | UPSP:PARC_HUMAN | 5 R.DSHSIFDAQM*TR.E          |
| 2 2 4.427 0.00   | UPSP:TBA2_HUMAN   | 1118 | 1      | 2    | 8/12   | 0.0295 | 0.0295 | 1.7661    | UPSP:PARC_HUMAN | 6 R.EFAVNL.RN                |
| 2 2 4.410 0.00   | UPSP:GRP78_HUMAN  | 0758 | 1      | 2    | 14/24  | 0.3043 | 0.3043 | 3.0644    | UPSP:PARC_HUMAN | 5 R.EGSPGGAVRPLLR.R          |
| 2 2 4.378 0.00   | UPTR:Q96FW6_HUMAN | 2133 | 1      | 2    | 22/32  | 0.5575 | 0.5575 | 4.2857    | UPSP:PARC_HUMAN | 6 R.FEGSTLNDLLNSQIYTK.Y      |
| 2 2 4.218 0.00   | UPSP:G3P_HUMAN    | 1299 | 1      | 2    | 11/12  | 0.1934 | 0.1934 | 2.4670    | UPSP:PARC_HUMAN | 5 R.FLAAAW.RA                |
| 2 2 3.875 0.00   | UPSP:RL7_HUMAN    | 1065 | 1      | 3    | 35/76  | 0.4500 | 0.4500 | 4.2533    | UPSP:PARC_HUMAN | 6 R.FSSFYSSQSNHPVLDL*GPHR.I  |
| 2 2 3.661 0.00   | UPTR:Q9BS10_HUMAN | 2433 | 1      | 3    | 27/60  | 0.4729 | 0.4729 | 4.5919    | UPSP:PARC_HUMAN | 5 R.GVEVLGPKPTWPLFR.E        |
| 2 2 3.620 0.00   | UPTR:Q6IPX9_HUMAN | 1007 | 1      | 2    | 15/22  | 0.4728 | 0.4728 | 2.9748    | UPSP:PARC_HUMAN | 5 R.HAGDLM*VPLGPR.L          |
| 2 2 3.554 0.00   | UPSP:RL21_HUMAN   | 1681 | 1      | 2    | 21/24  | 0.4381 | 0.4381 | 4.1353    | UPSP:PARC_HUMAN | 6 R.LLAILQHSADFR.V           |
| 2 2 3.378 0.00   | UPSP:SYR_HUMAN    | 1663 | 1      | 2    | 10/14  | 0.0340 | 0.0340 | 1.9905    | UPSP:PARC_HUMAN | 4 R.LLYLLM*TK.H              |
| 2 2 3.248 0.00   | UPTR:Q59F19_HUMAN | 1851 | 1      | 2    | 27/32  | 0.4986 | 0.4986 | 5.7242    | UPSP:PARC_HUMAN | 6 R.LPOLM*QSLSTSEELQR.Q      |
| 2 2 3.035 0.00   | UPTR:Q9NQS8_HUMAN | 2111 | 1      | 2    | 24/32  | 0.4936 | 0.4936 | 5.6182    | UPSP:PARC_HUMAN | 6 R.LPOLMIQSLSTSEELQR.Q      |
| 2 2 2.936 0.00   | GP:M77233_1       | 1487 | 1      | 2    | 15/18  | 0.1706 | 0.1706 | 2.4245    | UPSP:PARC_HUMAN | 5 R.LQAYPEELR.Q              |
| 2 2 2.663 0.00   | UPSP:RS9_HUMAN    | 2461 | 1      | 2    | 21/24  | 0.3515 | 0.3515 | 5.0070    | UPSP:PARC_HUMAN | 5 R.LQOETOPFLLLLR.T          |
| 1 1 6.738 0.00   | UPTR:Q61C01_HUMAN | 2028 | 1      | 2    | 11/14  | 0.1161 | 0.1161 | 2.3831    | UPSP:PARC_HUMAN | 6 R.LQWTWLR.GR.A             |
| 1 1 5.678 0.00   | UPSP:TCPE_HUMAN   | 1593 | 1      | 3    | 19/32  | 0.1115 | 0.1115 | 3.0142    | UPSP:PARC_HUMAN | 6 R.QFHFLQRL.L               |
| 1 1 5.396 0.00   | UPSP:AP2B1_HUMAN  | 2137 | 1      | 2    | 15/34  | 0.1993 | 0.1993 | 2.3199    | UPSP:PARC_HUMAN | 4 R.QSNNGIPPVQVFWQSTGR.T     |
| 1 1 5.307 0.00   | UPSP:MAGB2_HUMAN  | 0926 | 1      | 2    | 10/12  | 0.1182 | 0.1182 | 2.1793    | UPSP:PARC_HUMAN | 5 R.RQGVVFR.Q                |
| 1 1 5.195 0.00   | UPSP:RS6_HUMAN    | 2516 | 1      | 2    | 19/34  | 0.3608 | 0.3608 | 3.4220    | UPSP:PARC_HUMAN | 5 R.SGEALWLIPQAYLVNVEK.D     |
| 1 1 4.952 0.00   | UPSP:RL14_HUMAN   | 2384 | 1      | 2    | 18/42  | 0.3999 | 0.3999 | 3.8902    | UPSP:PARC_HUMAN | 5 R.SGEALWLIPQAYLVNVEKDEGI   |
| 1 1 4.905 0.00   | UPSP:RL9_HUMAN    | 2363 | 1      | 3    | 30/92  | 0.5139 | 0.5139 | 4.3534    | UPSP:PARC_HUMAN | 5 R.SGFSGALLQOSFLTAAHM*SEQ   |
| 1 1 4.742 0.00   | UPTR:Q6NZ54_HUMAN | 1256 | 1      | 2    | 19/30  | 0.4830 | 0.4830 | 4.5462    | UPSP:PARC_HUMAN | 5 R.SGVGEYVQOTIQPGM*R.V      |

|   |   |       |      |                   |   |      |   |   |        |        |        |        |                 |   |                           |
|---|---|-------|------|-------------------|---|------|---|---|--------|--------|--------|--------|-----------------|---|---------------------------|
| 1 | 1 | 4.645 | 0.00 | UPTR:O75147_HUMAN | □ | 1417 | 1 | 2 | 18/30  | 0.4068 | 0.4068 | 4.1901 | UPSP:PARC_HUMAN | 5 | R.SGYGEYVQQTLQPGMR.V      |
| 1 | 1 | 4.612 | 0.00 | UPSP:SDPR_HUMAN   | □ | 2694 | 1 | 2 | 27/42  | 0.4596 | 0.4596 | 5.9261 | UPSP:PARC_HUMAN | 5 | R.SIFQPYISGSLLLPTVITTPR.R |
| 1 | 1 | 4.588 | 0.00 | UPSP:LA_HUMAN     | □ | 2399 | 1 | 2 | 22/30  | 0.5176 | 0.5176 | 4.8656 | UPSP:PARC_HUMAN | 5 | R.SLVGGPSAELLLDLFLR.V     |
| 1 | 1 | 4.567 | 0.00 | UPSP:RL10_HUMAN   | □ | 1102 | 1 | 2 | 15/26  | 0.3395 | 0.3395 | 2.8862 | UPSP:PARC_HUMAN | 5 | R.SPAPSPVLPSSSLR.N        |
| 1 | 1 | 4.538 | 0.00 | UPTR:Q5JR95_HUMAN | □ | 2743 | 1 | 2 | 22/28  | 0.4458 | 0.4458 | 4.2121 | UPSP:PARC_HUMAN | 6 | R.THOPINIPFFDVFLR.H       |
| 1 | 1 | 4.478 | 0.00 | UPSP:RS17_HUMAN   | □ | 1984 | 1 | 2 | 15/16  | 0.2533 | 0.2533 | 2.5277 | UPSP:PARC_HUMAN | 5 | R.TILM*M*LNR.Y            |
| 1 | 1 | 4.405 | 0.00 | UPTR:Q6ICQ4_HUMAN | □ | 2355 | 1 | 2 | 14/16  | 0.1423 | 0.2890 | 2.5961 | UPSP:PARC_HUMAN | 5 | R.TILM*M*LLNR.Y           |
| 1 | 1 | 4.402 | 0.00 | GP:X60020_1       | □ | 0392 | 1 | 2 | 13/16  | 0.2646 | 0.2646 | 2.4141 | UPSP:PARC_HUMAN | 5 | R.TLDAPGPNK.T             |
| 1 | 1 | 4.319 | 0.00 | UPSP:MDM2_HUMAN   | □ | 0643 | 1 | 2 | 17/22  | 0.3606 | 0.3606 | 3.4825 | UPSP:PARC_HUMAN | 6 | R.TM*SPQVEGLM*K.Q         |
| 1 | 1 | 4.301 | 0.00 | UPSP:COA2_HUMAN   | □ | 1116 | 1 | 2 | 15/22  | 0.2830 | 0.2830 | 2.4627 | UPSP:PARC_HUMAN | 6 | R.TM*SPQVEGLMK.Q          |
| 1 | 1 | 4.270 | 0.00 | UPTR:Q59FS3_HUMAN | □ | 1461 | 1 | 2 | 18/26  | 0.5004 | 0.5004 | 5.1485 | UPSP:PARC_HUMAN | 6 | R.VGLQSPSVEAWEAK.G        |
| 1 | 1 | 4.235 | 0.00 | UPTR:Q53G49_HUMAN | □ | 1514 | 1 | 2 | 15/16  | 0.2018 | 0.2018 | 3.1822 | UPSP:PARC_HUMAN | 4 | R.VILLENLNR.F             |
| 1 | 1 | 4.166 | 0.00 | UPSP:IF2G_HUMAN   | □ | 0562 | 1 | 2 | 18/20  | 0.4409 | 0.4409 | 3.8727 | UPSP:PARC_HUMAN | 6 | R.VSAIHEVPPR.S            |
| 1 | 1 | 4.087 | 0.00 | UPSP:DDX1_HUMAN   | □ | 2022 | 1 | 3 | 37/96  | 0.3624 | 0.3624 | 4.7703 | UPSP:PARC_HUMAN | 5 | R.YIDQIQGGLIGGAPGVEM*LG   |
| 1 | 1 | 4.082 | 0.00 | UPSP:DBPA_HUMAN   | □ | 2348 | 1 | 3 | 34/96  | 0.3643 | 0.3643 | 4.2653 | UPSP:PARC_HUMAN | 5 | R.YIDQIQGGLIGGAPGVEMLG.Q  |
| 1 | 1 | 4.054 | 0.00 | UPSP:H2B1B_HUMAN  | □ | 0462 | 1 | 2 | 16/18  | 0.3093 | 0.3093 | 2.9897 | UPSP:CUL7_HUMAN | 2 | K.AAHVSEFAR.H             |
| 1 | 1 | 4.007 | 0.00 | UPTR:Q6PB27_HUMAN | □ | 0544 | 1 | 2 | 16/24  | 0.3670 | 0.3670 | 2.6332 | UPSP:CUL7_HUMAN | 2 | K.EPPSOSNTPIOR.L          |
| 1 | 1 | 3.998 | 0.00 | UPSP:TCPD_HUMAN   | □ | 0543 | 1 | 2 | 12/12  | 0.2714 | 0.2714 | 2.4605 | UPSP:CUL7_HUMAN | 2 | K.HLDFDSR.C               |
| 1 | 1 | 3.985 | 0.00 | UPSP:SYD_HUMAN    | □ | 2122 | 1 | 3 | 33/68  | 0.4324 | 0.4324 | 4.6642 | UPSP:CUL7_HUMAN | 2 | K.ILLDLQALSSSEGTOENK.V    |
| 1 | 1 | 3.880 | 0.00 | UPTR:Q6IRZ0_HUMAN | □ | 0705 | 1 | 1 | 13/18  | 0.2454 | 0.2454 | 2.2170 | UPSP:CUL7_HUMAN | 2 | K.IQVGLGASGK.E            |
| 1 | 1 | 3.879 | 0.00 | UPSP:HSP72_HUMAN  | □ | 0584 | 1 | 2 | 16/20  | 0.3596 | 0.3596 | 3.0684 | UPSP:CUL7_HUMAN | 2 | K.KIQVGLGASGK.E           |
| 1 | 1 | 3.840 | 0.00 | UPTR:Q5VTE0_HUMAN | □ | 2500 | 1 | 3 | 35/128 | 0.3877 | 0.3877 | 4.2002 | UPSP:CUL7_HUMAN | 2 | K.KYGPALAGNQAYPSLLEAQE    |
| 1 | 1 | 3.765 | 0.00 | UPSP:KCI1AL_HUMAN | □ | 1229 | 1 | 2 | 13/14  | 0.0853 | 0.0853 | 3.3701 | UPSP:CUL7_HUMAN | 2 | K.ILELQFL.R.D             |
| 1 | 1 | 3.671 | 0.00 | UPSP:HSP76_HUMAN  | □ | 1318 | 1 | 2 | 28/46  | 0.5589 | 0.5589 | 6.0018 | UPSP:CUL7_HUMAN | 2 | K.M*IGEDGQVIGPSQESAGEVG/  |
| 1 | 1 | 3.620 | 0.00 | UPTR:Q1JQ76_HUMAN | □ | 1455 | 1 | 2 | 27/46  | 0.4827 | 0.4827 | 5.6671 | UPSP:CUL7_HUMAN | 2 | K.MLGEDGQVIGPSQESAGEVGA   |
| 1 | 1 | 3.597 | 0.00 | UPSP:HNRPO_HUMAN  | □ | 1686 | 1 | 2 | 18/20  | 0.3318 | 0.3318 | 3.2310 | UPSP:CUL7_HUMAN | 2 | K.OVNFLTSSWR.D            |
| 1 | 1 | 3.588 | 0.00 | UPTR:Q5JP53_HUMAN | □ | 1853 | 1 | 3 | 46/132 | 0.4937 | 0.4937 | 7.6666 | UPSP:CUL7_HUMAN | 2 | K.RYLHVTSLLDQLNDSAAEPGA   |
| 1 | 1 | 3.577 | 0.00 | GP:AE006463_8     | □ | 0668 | 1 | 2 | 17/20  | 0.4314 | 0.4314 | 3.9138 | UPSP:CUL7_HUMAN | 2 | K.SVLEEM*ETDVK.S          |
| 1 | 1 | 3.557 | 0.00 | UPSP:HS90A_HUMAN  | □ | 1529 | 1 | 2 | 14/20  | 0.3131 | 0.3131 | 2.6216 | UPSP:CUL7_HUMAN | 2 | K.SVLEEMETDVK.S           |
| 1 | 1 | 3.500 | 0.00 | UPSP:MDM4_HUMAN   | □ | 1471 | 1 | 2 | 17/18  | 0.3872 | 0.3872 | 3.2581 | UPSP:CUL7_HUMAN | 2 | K.VKPLLLQLR.Q             |
| 1 | 1 | 3.499 | 0.00 | UPSP:HS70L_HUMAN  | □ | 2618 | 1 | 3 | 43/124 | 0.5660 | 0.5660 | 5.5243 | UPSP:CUL7_HUMAN | 2 | K.YGPALAGNQAYPSLLEAQED    |
| 1 | 1 | 3.497 | 0.00 | UPSP:PCCA_HUMAN   | □ | 0718 | 1 | 2 | 11/12  | 0.0766 | 0.0766 | 1.8806 | UPSP:CUL7_HUMAN | 2 | R.DDDVPR.Y                |
| 1 | 1 | 3.478 | 0.00 | UPSP:TCPB_HUMAN   | □ | 0112 | 1 | 2 | 11/14  | 0.1829 | 0.1829 | 2.0937 | UPSP:CUL7_HUMAN | 2 | R.DTLQPGM*R.V             |
| 1 | 1 | 3.362 | 0.00 | UPSP:HNRPD_HUMAN  | □ | 1687 | 1 | 2 | 17/22  | 0.3633 | 0.3633 | 3.9173 | UPSP:CUL7_HUMAN | 2 | R.DYAVVLNQLGAR.D          |
| 1 | 1 | 3.361 | 0.00 | UPTR:Q5VVC8_HUMAN | □ | 2680 | 1 | 2 | 17/22  | 0.1137 | 0.1137 | 4.2781 | UPSP:CUL7_HUMAN | 2 | R.EVLQELIFLHR.L           |
| 1 | 1 | 3.357 | 0.00 | UPTR:Q53EN9_HUMAN | □ | 1296 | 1 | 2 | 21/24  | 0.3061 | 0.3061 | 3.5881 | UPSP:CUL7_HUMAN | 8 | R.FLPDDEAAQALGK.T         |
| 1 | 1 | 3.351 | 0.00 | UPSP:RL18_HUMAN   | □ | 2265 | 1 | 2 | 12/14  | 0.0196 | 0.0196 | 2.4518 | UPSP:CUL7_HUMAN | 7 | R.FWPIQR.I                |
| 1 | 1 | 3.102 | 0.00 | UPSP:SYK_HUMAN    | □ | 2517 | 1 | 2 | 17/30  | 0.4389 | 0.4389 | 3.4029 | UPSP:CUL7_HUMAN | 2 | R.GLEILGPKPTFWPVFR.E      |
| 1 | 1 | 3.101 | 0.00 | UPTR:Q5JWB0_HUMAN | □ | 0733 | 1 | 1 | 7/14   | 0.1630 | 0.1630 | 1.6557 | UPSP:CUL7_HUMAN | 2 | R.GLVSSLGK.G              |
| 1 | 1 | 3.077 | 0.00 | UPSP:RL13_HUMAN   | □ | 0984 | 1 | 2 | 10/12  | 0.1885 | 0.1885 | 2.2211 | UPSP:CUL7_HUMAN | 2 | R.GPAFSR.V                |
| 1 | 1 | 3.069 | 0.00 | GP:AY891881_1     | □ | 0569 | 1 | 2 | 14/16  | 0.3823 | 0.3823 | 3.4820 | UPSP:CUL7_HUMAN | 2 | R.GPDLHEQKD.D             |
| 1 | 1 | 2.814 | 0.00 | UPSP:DHX9_HUMAN   | □ | 1294 | 1 | 3 | 24/64  | 0.4060 | 0.4060 | 3.8084 | UPSP:CUL7_HUMAN | 2 | R.GPDLHEQKIDIPGGVLK.I     |
|   |   |       |      |                   |   | 2769 | 1 | 3 | 28/88  | 0.4079 | 0.4079 | 4.3136 | UPSP:CUL7_HUMAN | 2 | R.GQLELEFSM*AM*GTLISELVQ  |
|   |   |       |      |                   |   | 0319 | 1 | 2 | 17/18  | 0.1840 | 0.1840 | 3.6296 | UPSP:CUL7_HUMAN | 2 | R.HIDQIQGSR.I             |
|   |   |       |      |                   |   | 1552 | 1 | 2 | 23/38  | 0.3746 | 0.3746 | 2.7451 | UPSP:CUL7_HUMAN | 2 | R.LIPPOTYQAEGEDGQNLK.R    |
|   |   |       |      |                   |   | 0452 | 1 | 2 | 12/12  | 0.1748 | 0.1748 | 2.3680 | UPSP:CUL7_HUMAN | 2 | R.LNDSALR.D               |
|   |   |       |      |                   |   | 0898 | 1 | 2 | 13/24  | 0.3210 | 0.3210 | 2.6753 | UPSP:CUL7_HUMAN | 2 | R.LPQOM*LQSLSTSK.E        |
|   |   |       |      |                   |   | 1454 | 1 | 2 | 19/24  | 0.3823 | 0.3823 | 3.9411 | UPSP:CUL7_HUMAN | 2 | R.LPQOMLQSLSTSK.E         |
|   |   |       |      |                   |   | 0590 | 1 | 2 | 15/18  | 0.3687 | 0.3687 | 3.0308 | UPSP:CUL7_HUMAN | 2 | R.LVEGYGPAGK.I            |
|   |   |       |      |                   |   | 0498 | 1 | 2 | 20/24  | 0.4497 | 0.4497 | 3.7290 | UPSP:CUL7_HUMAN | 2 | R.M*IQALSSHDAGTR.T        |
|   |   |       |      |                   |   | 1446 | 1 | 3 | 31/64  | 0.3622 | 0.3622 | 3.7057 | UPSP:CUL7_HUMAN | 8 | R.M*LDYEEISAGDEGEFR.Q     |
|   |   |       |      |                   |   | 1728 | 1 | 2 | 15/32  | 0.2050 | 0.2050 | 2.7548 | UPSP:CUL7_HUMAN | 8 | R.MLDYEEISAGDEGEFR.Q      |
|   |   |       |      |                   |   | 0111 | 1 | 2 | 11/14  | 0.0801 | 0.0801 | 1.6180 | UPSP:CUL7_HUMAN | 2 | R.QEQNFADR.F              |
|   |   |       |      |                   |   | 1868 | 1 | 2 | 24/32  | 0.4878 | 0.4878 | 4.6842 | UPSP:CUL7_HUMAN | 7 | R.OFHVYQLQQLDQELLK.L      |
|   |   |       |      |                   |   | 2090 | 1 | 3 | 27/60  | 0.2506 | 0.2506 | 4.4303 | UPSP:CUL7_HUMAN | 2 | R.QLTLVASEDSSYM*PAR.V     |
|   |   |       |      |                   |   | 1667 | 1 | 2 | 23/32  | 0.4157 | 0.4157 | 5.1650 | UPSP:CUL7_HUMAN | 7 | R.QLTLVASEDSSYMPAR.V      |
|   |   |       |      |                   |   | 2090 | 1 | 3 | 29/72  | 0.3164 | 0.3164 | 4.3630 | UPSP:CUL7_HUMAN | 2 | R.QPOPFLALMQSLDTPETNR.T   |
|   |   |       |      |                   |   | 2633 | 1 | 3 | 25/72  | 0.3571 | 0.3571 | 3.9194 | UPSP:CUL7_HUMAN | 2 | R.QPOPFLALMQSLDTPETNR.T   |
|   |   |       |      |                   |   | 2064 | 1 | 2 | 21/34  | 0.4861 | 0.4861 | 3.2180 | UPSP:CUL7_HUMAN | 2 | R.QSNNGVPPVQVFWESTGR.T    |
|   |   |       |      |                   |   | 1479 | 1 | 2 | 20/26  | 0.4326 | 0.4326 | 3.3158 | UPSP:CUL7_HUMAN | 2 | R.SFEASGNTYALYVR.D        |
|   |   |       |      |                   |   | 0751 | 1 | 2 | 15/18  | 0.4407 | 0.4407 | 2.6660 | UPSP:CUL7_HUMAN | 2 | R.SHDWSSLATR.G            |
|   |   |       |      |                   |   | 2139 | 1 | 3 | 34/104 | 0.4918 | 0.4918 | 4.9262 | UPSP:CUL7_HUMAN | 2 | R.SPGSIFQPLADVSPGLPAAQA   |
|   |   |       |      |                   |   | 2622 | 1 | 3 | 32/56  | 0.3498 | 0.3498 | 4.1034 | UPSP:CUL7_HUMAN | 1 | R.THRPINIPFFDVFLR.Y       |
|   |   |       |      |                   |   | 1159 | 1 | 2 | 13/14  | 0.0698 | 0.0698 | 2.0158 | UPSP:CUL7_HUMAN | 3 | R.TLHLTVLR.I              |
|   |   |       |      |                   |   | 1854 | 1 | 2 | 22/28  | 0.3449 | 0.3449 | 3.9829 | UPSP:CUL7_HUMAN | 2 | R.TOILLI.SQQAIEK.H        |
|   |   |       |      |                   |   | 0475 | 1 | 2 | 15/22  | 0.2975 | 0.2975 | 2.9008 | UPSP:CUL7_HUMAN | 2 | R.VGHDGHPYQIR.W           |



|      |   |   |        |        |        |        |                 |    |                            |
|------|---|---|--------|--------|--------|--------|-----------------|----|----------------------------|
| 1714 | 1 | 2 | 15/16  | 0.2144 | 0.2144 | 2.9832 | UPSP:CUL7_HUMAN | 2  | R.VILLENLTR.F              |
| 1890 | 1 | 2 | 17/32  | 0.3795 | 0.3795 | 3.3189 | UPSP:CUL7_HUMAN | 2  | R.VLDLIM*HM*LSSPDYQIR.W    |
| 2424 | 1 | 2 | 13/32  | 0.2230 | 0.2786 | 2.5445 | UPSP:CUL7_HUMAN | 2  | R.VLDLIM*HMLSSPDYQIR.W     |
| 1631 | 1 | 2 | 11/12  | 0.0764 | 0.0764 | 2.2139 | UPSP:CUL7_HUMAN | 2  | R.VLFSLVK.R                |
| 1694 | 1 | 3 | 31/60  | 0.5287 | 0.5287 | 4.4522 | UPSP:CUL7_HUMAN | 2  | R.VPI.GPLGHAYPDELIR.Q      |
| 2034 | 1 | 3 | 38/128 | 0.4010 | 0.4010 | 5.5083 | UPSP:CUL7_HUMAN | 2  | R.YLVHTSLLDQLNDSAAEPGAO.   |
| 0560 | 1 | 2 | 11/12  | 0.2027 | 0.2027 | 2.2073 | UPSP:CUL7_HUMAN | 2  | R.YSNFYNK.S                |
| 1268 | 1 | 2 | 13/14  | 0.1682 | 0.1682 | 1.9468 | UPSP:COA1_HUMAN | 2  | K.AVVM*DLR.Q               |
| 2171 | 1 | 3 | 28/60  | 0.3077 | 0.3077 | 4.6556 | UPSP:COA1_HUMAN | 4  | K.AYVVDNKNDLAEWLEK.Q       |
| 1651 | 1 | 2 | 13/18  | 0.1298 | 0.1298 | 2.3804 | UPSP:COA1_HUMAN | 9  | K.FGAYIVDGLR.E             |
| 2317 | 1 | 2 | 21/44  | 0.5864 | 0.5864 | 4.1657 | UPSP:COA1_HUMAN | 4  | K.IASSIVAQTAGIPTLPWSGSLR   |
| 1430 | 1 | 3 | 33/64  | 0.3178 | 0.3178 | 4.5948 | UPSP:COA1_HUMAN | 4  | K.ITDIIGKEEGIGPENLR.G      |
| 0899 | 1 | 2 | 17/20  | 0.3498 | 0.3498 | 3.5291 | UPSP:COA1_HUMAN | 2  | K.LLETESFQM*NR.I           |
| 1627 | 1 | 2 | 10/12  | 0.1226 | 0.1226 | 2.2766 | UPSP:COA1_HUMAN | 4  | K.IPELLK.N                 |
| 0601 | 1 | 2 | 13/16  | 0.0081 | 0.0081 | 2.0510 | UPSP:COA1_HUMAN | 10 | K.M*HLYLGAOK.V             |
| 2160 | 1 | 3 | 26/76  | 0.3040 | 0.3040 | 3.0787 | UPSP:COA1_HUMAN | 3  | K.RFOAQLSGTTYDIPEM*FR.Q    |
| 1611 | 1 | 3 | 35/72  | 0.4915 | 0.4915 | 5.6128 | UPSP:COA1_HUMAN | 8  | K.RIPVQAVWAGWGHASENPK.L    |
| 2315 | 1 | 3 | 31/68  | 0.3985 | 0.3985 | 5.0553 | UPSP:COA1_HUMAN | 2  | K.SDM*NTVLNYIFSHAQVTK.K    |
| 2379 | 1 | 3 | 33/84  | 0.2247 | 0.2247 | 3.9211 | UPSP:COA1_HUMAN | 2  | K.TLRDPSLPLLELQDIM*TSVSGE  |
| 2792 | 1 | 3 | 34/84  | 0.4325 | 0.4325 | 5.1788 | UPSP:COA1_HUMAN | 2  | K.TLRDPSLPLLELQDIMTSVSGR.  |
| 0879 | 1 | 2 | 18/20  | 0.4212 | 0.4212 | 4.0077 | UPSP:COA1_HUMAN | 3  | K.VEVGTEVTDYR.F            |
| 1235 | 1 | 2 | 18/22  | 0.0406 | 0.0406 | 2.2645 | UPSP:COA1_HUMAN | 2  | K.VLIANNGIAAVK.C           |
| 1740 | 1 | 2 | 16/18  | 0.2686 | 0.2686 | 3.4959 | UPSP:COA1_HUMAN | 11 | R.AIGIGAYLVR.L             |
| 1816 | 1 | 2 | 18/24  | 0.4147 | 0.4147 | 4.2008 | UPSP:COA1_HUMAN | 11 | R.DFTVASPAFVTR.F           |
| 2452 | 1 | 2 | 14/22  | 0.4198 | 0.4198 | 3.1998 | UPSP:COA1_HUMAN | 4  | R.EGLPLM*VFANWR.G          |
| 2249 | 1 | 3 | 25/60  | 0.2788 | 0.2788 | 3.4694 | UPSP:COA1_HUMAN | 2  | R.EVFFM*NTQISIVQLVQR.Y     |
| 2556 | 1 | 2 | 20/30  | 0.2182 | 0.2182 | 4.6371 | UPSP:COA1_HUMAN | 2  | R.EVFFMNTQISIVQLVQR.Y      |
| 2081 | 1 | 2 | 27/38  | 0.4769 | 0.4769 | 6.1663 | UPSP:COA1_HUMAN | 5  | R.FIGSVSDENSEDEISNLVK.L    |
| 2321 | 1 | 2 | 21/36  | 0.5900 | 0.5900 | 5.4766 | UPSP:COA1_HUMAN | 3  | R.FOQAQLSGTTYDIPEM*FR.Q    |
| 1539 | 1 | 2 | 16/20  | 0.2190 | 0.2190 | 3.0436 | UPSP:COA1_HUMAN | 8  | R.FVVM*VTPEDIK.A           |
| 2470 | 1 | 3 | 32/88  | 0.4961 | 0.4961 | 5.2292 | UPSP:COA1_HUMAN | 2  | R.GVLPAAHTLLNTVDVELIYEGV   |
| 1202 | 1 | 2 | 19/24  | 0.2282 | 0.2282 | 3.8678 | UPSP:COA1_HUMAN | 4  | R.GSVLEPEGTVEIK.F          |
| 1048 | 1 | 2 | 13/14  | 0.2280 | 0.2280 | 2.8145 | UPSP:COA1_HUMAN | 4  | R.IGLAFEEH                 |
| 2343 | 1 | 2 | 21/26  | 0.3880 | 0.3880 | 4.2474 | UPSP:COA1_HUMAN | 4  | R.IGSFGPOEDLLFLR.A         |
| 1275 | 1 | 2 | 13/14  | 0.0445 | 0.0445 | 2.3492 | UPSP:COA1_HUMAN | 4  | R.IIEFVPTK.T               |
| 1502 | 1 | 2 | 17/20  | 0.2153 | 0.2153 | 3.1323 | UPSP:COA1_HUMAN | 4  | R.IINVPQELYEK.G            |
| 1777 | 1 | 3 | 26/68  | 0.0081 | 0.0081 | 3.0134 | UPSP:COA1_HUMAN | 8  | R.IPVQAVWAGWGHASENPK.L     |
| 1433 | 1 | 3 | 31/88  | 0.4357 | 0.4357 | 4.4520 | UPSP:COA1_HUMAN | 7  | R.ITSENPEDEGFKPSSGTVOELNFR |
| 1649 | 1 | 2 | 19/26  | 0.4212 | 0.4212 | 2.9607 | UPSP:COA1_HUMAN | 4  | R.LGGIPVGVAVVETR.T         |
| 1463 | 1 | 2 | 19/24  | 0.4194 | 0.4194 | 4.2185 | UPSP:COA1_HUMAN | 2  | R.LPGGNEIGM*VAWK.M         |
| 1734 | 1 | 3 | 26/96  | 0.1532 | 0.1532 | 3.5448 | UPSP:COA1_HUMAN | 2  | R.LSDGGILLSYDSSSYTTYM*KI   |
| 1110 | 1 | 2 | 13/16  | 0.1878 | 0.1878 | 2.6893 | UPSP:COA1_HUMAN | 2  | R.M*AALVYVVR               |
| 0520 | 1 | 2 | 12/14  | 0.1688 | 0.1688 | 2.0494 | UPSP:COA1_HUMAN | 2  | R.M*GGM*VSFR.T             |
| 1932 | 1 | 2 | 16/22  | 0.3791 | 0.3791 | 2.9207 | UPSP:COA1_HUMAN | 2  | R.NSVSNFLHSLER.G           |
| 1490 | 1 | 2 | 19/28  | 0.2675 | 0.2675 | 3.9247 | UPSP:COA1_HUMAN | 2  | R.QVQAEVPGSPFVM*RI         |
| 1845 | 1 | 2 | 18/28  | 0.4465 | 0.4465 | 3.8031 | UPSP:COA1_HUMAN | 2  | R.QVQAEVPGSPFVMR.L         |
| 1060 | 1 | 3 | 21/44  | 0.3143 | 0.3143 | 3.7989 | UPSP:COA1_HUMAN | 4  | R.RVDPVYH.AER.L            |
| 1248 | 1 | 2 | 10/12  | 0.1041 | 0.1041 | 2.0821 | UPSP:COA1_HUMAN | 2  | R.TFEDFVR.I                |
| 1508 | 1 | 3 | 35/72  | 0.4251 | 0.4251 | 4.4365 | UPSP:COA1_HUMAN | 4  | R.TIQVENSHELLTGAGALNK.V    |
| 1438 | 1 | 2 | 13/18  | 0.1969 | 0.1969 | 2.2359 | UPSP:COA1_HUMAN | 4  | R.YLYLTPQDYK.R             |
| 0080 | 1 | 2 | 17/26  | 0.3687 | 0.3687 | 3.3920 | UPSP:P53_HUMAN  | 30 | K.KGEPHHELPPGSKT.R         |
| 1532 | 1 | 3 | 29/52  | 0.3007 | 0.3007 | 4.9203 | UPSP:P53_HUMAN  | 24 | K.KKPLDGEYFTLQIR.G         |
| 1723 | 1 | 3 | 24/48  | 0.1675 | 0.1675 | 3.6764 | UPSP:P53_HUMAN  | 24 | K.KPLDGEYFTLQIR.G          |
| 0416 | 1 | 2 | 14/18  | 0.1857 | 0.1857 | 2.2124 | UPSP:P53_HUMAN  | 37 | K.OSQHMTEVVR.R             |
| 0366 | 1 | 2 | 20/26  | 0.2899 | 0.2899 | 3.8375 | UPSP:P53_HUMAN  | 28 | K.RALPNNTSSSPQPK.K         |
| 0767 | 1 | 1 | 11/16  | 0.2938 | 0.2938 | 2.4728 | UPSP:P53_HUMAN  | 27 | K.TYQGSYGFRL               |
| 0404 | 1 | 2 | 19/24  | 0.5982 | 0.5982 | 2.8052 | UPSP:P53_HUMAN  | 28 | R.ALPNNTSSSPQPK.K          |
| 0058 | 1 | 1 | 7/10   | 0.0095 | 0.0095 | 1.6279 | UPSP:P53_HUMAN  | 35 | R.AM*AIYK.Q                |
| 1173 | 1 | 2 | 13/16  | 0.1569 | 0.1569 | 1.8805 | UPSP:P53_HUMAN  | 25 | R.ELNEALELKD               |
| 0941 | 1 | 2 | 23/28  | 0.4263 | 0.4263 | 5.0268 | UPSP:P53_HUMAN  | 25 | R.ELNEALELKDAQAGKE         |
| 0859 | 1 | 3 | 35/80  | 0.4367 | 0.4367 | 5.4777 | UPSP:P53_HUMAN  | 25 | R.ELNEALELKDAQAGKEPGGSR    |
| 0651 | 1 | 2 | 10/12  | 0.1615 | 0.1615 | 1.6149 | UPSP:P53_HUMAN  | 25 | R.ERFEM*FR.E               |
| 0011 | 1 | 3 | 23/56  | 0.2887 | 0.2887 | 3.3791 | UPSP:P53_HUMAN  | 30 | R.KKGEPHHELPPGSKT.R        |
| 0749 | 1 | 2 | 17/18  | 0.1872 | 0.1872 | 3.0995 | UPSP:P53_HUMAN  | 26 | R.LGLHSGTAK.S              |
| 0515 | 1 | 1 | 7/10   | 0.0158 | 0.0158 | 1.8705 | UPSP:P53_HUMAN  | 28 | R.NSFEVR.V                 |
| 2288 | 1 | 3 | 35/72  | 0.1024 | 0.1024 | 5.7571 | UPSP:P53_HUMAN  | 27 | R.RPILTIITLEDSSGNLLGR.N    |

|      |   |   |        |        |        |        |                  |    |                           |
|------|---|---|--------|--------|--------|--------|------------------|----|---------------------------|
| 0081 | 1 | 2 | 12/14  | 0.0540 | 0.0540 | 2.9933 | UPSP:P53_HUMAN   | 30 | R.RTEENLR.K               |
| 0004 | 1 | 2 | 11/12  | 0.0026 | 0.0026 | 2.3992 | UPSP:P53_HUMAN   | 30 | R.TEENLR.K                |
| 1140 | 1 | 3 | 26/48  | 0.3702 | 0.3702 | 3.5180 | UPSP:P53_HUMAN   | 36 | R.VEGNLRVEYLDDRR.N        |
| 0650 | 1 | 2 | 11/12  | 0.2360 | 0.2360 | 2.5555 | UPSP:P53_HUMAN   | 36 | R.VEYLDDRR.N              |
| 1062 | 1 | 2 | 17/22  | 0.2795 | 0.2795 | 2.9427 | UPSP:BRE1A_HUMAN | 4  | K.AM*FAAQLADDLK.A         |
| 1232 | 1 | 2 | 21/24  | 0.3995 | 0.3995 | 3.9278 | UPSP:BRE1A_HUMAN | 8  | K.LGGVSSSTEELDIR.T        |
| 1537 | 1 | 3 | 36/64  | 0.3368 | 0.3368 | 5.6092 | UPSP:BRE1A_HUMAN | 4  | K.LLKEEKEELADQVLT.LK.T    |
| 2166 | 1 | 2 | 12/28  | 0.2069 | 0.2069 | 3.0108 | UPSP:BRE1A_HUMAN | 5  | K.RYDLEQGLDILLTER.K       |
| 1085 | 1 | 2 | 14/20  | 0.2262 | 0.2262 | 2.9908 | UPSP:BRE1A_HUMAN | 4  | R.AVEEQEYLOK.K            |
| 2464 | 1 | 3 | 27/120 | 0.3548 | 0.3548 | 3.7767 | UPSP:BRE1A_HUMAN | 4  | R.EREGEQEPAFSFLATLASSSSEI |
| 2597 | 1 | 3 | 45/112 | 0.5618 | 0.5618 | 6.6256 | UPSP:BRE1A_HUMAN | 4  | R.GEQEPAFSFLATLASSSSEEM   |
| 0630 | 1 | 2 | 13/14  | 0.2173 | 0.2173 | 2.6394 | UPSP:BRE1A_HUMAN | 8  | R.HLAEVLER.V              |
| 1485 | 1 | 3 | 28/68  | 0.3131 | 0.3131 | 3.6159 | UPSP:BRE1A_HUMAN | 8  | R.IEFFQTLAANFQAGPINR.E    |
| 1815 | 1 | 2 | 17/20  | 0.2566 | 0.2566 | 3.5821 | UPSP:BRE1A_HUMAN | 9  | R.IQLTDLLOEK.H            |
| 1350 | 1 | 2 | 19/24  | 0.3494 | 0.3494 | 3.5926 | UPSP:BRE1A_HUMAN | 8  | R.QATDDASLLIVNR.Y         |
| 0882 | 1 | 2 | 16/22  | 0.4176 | 0.4176 | 3.0576 | UPSP:BRE1A_HUMAN | 8  | R.RAVSQIVTVYDK.L          |
| 1973 | 1 | 2 | 20/26  | 0.2872 | 0.2872 | 4.0944 | UPSP:BRE1A_HUMAN | 15 | R.TVIOLEDITLAQVR.K        |
| 1915 | 1 | 2 | 21/24  | 0.4845 | 0.4845 | 4.2966 | UPSP:MCCC2_HUMAN | -  | K.AFYGDILTGTGAR.I         |
| 0871 | 1 | 2 | 13/18  | 0.1919 | 0.1919 | 1.8621 | UPSP:MCCC2_HUMAN | 1  | K.GGAYVYPTVK.K            |
| 2666 | 1 | 3 | 39/108 | 0.4376 | 0.4376 | 6.1130 | UPSP:MCCC2_HUMAN | 1  | K.KLDVTIEPSEPLPADELYGIV   |
| 1291 | 1 | 3 | 23/60  | 0.2076 | 0.2076 | 3.0954 | UPSP:MCCC2_HUMAN | 1  | K.QFSSADEAALKEPIK.K       |
| 1907 | 1 | 2 | 15/24  | 0.3516 | 0.3516 | 2.4180 | UPSP:MCCC2_HUMAN | -  | K.QGTIFLAGPPLV.K.A        |
| 2013 | 1 | 2 | 13/16  | 0.2349 | 0.2349 | 2.3007 | UPSP:MCCC2_HUMAN | -  | R.FLYIWPNAR.I             |
| 2364 | 1 | 2 | 23/40  | 0.5978 | 0.5978 | 4.7750 | UPSP:MCCC2_HUMAN | -  | R.IFGYPVGVGNNGVLFESAK.K   |
| 1964 | 1 | 2 | 26/34  | 0.4930 | 0.4930 | 5.1635 | UPSP:MCCC2_HUMAN | 1  | R.ISVM*GGFQAANVLAITTK.D   |
| 2241 | 1 | 2 | 23/34  | 0.4602 | 0.4602 | 5.6636 | UPSP:MCCC2_HUMAN | 1  | R.ISVMGGEQAAANVLAITTK.D   |
| 2811 | 1 | 2 | 26/32  | 0.5329 | 0.5329 | 5.5756 | UPSP:MCCC2_HUMAN | -  | R.NIPLLFLONTGFM*VGR.E     |
| 1530 | 1 | 2 | 14/24  | 0.2455 | 0.2455 | 2.6167 | UPSP:MCCC2_HUMAN | 1  | R.VWDDGHIDPADTR.L         |
| 1141 | 1 | 2 | 13/18  | 0.0676 | 0.0676 | 2.4608 | UPSP:NUCL_HUMAN  | 5  | K.EVFEDAAR.L              |
| 1871 | 1 | 2 | 20/26  | 0.4093 | 0.4093 | 4.0127 | UPSP:NUCL_HUMAN  | 6  | K.FGYVDFESAEDLEK.A        |
| 1809 | 1 | 2 | 20/26  | 0.4506 | 0.4506 | 4.2090 | UPSP:NUCL_HUMAN  | 7  | K.GFGVDFNSEEDAK.A         |
| 1507 | 1 | 2 | 13/14  | 0.2464 | 0.2464 | 2.0899 | UPSP:NUCL_HUMAN  | 6  | K.GIAYIEFK.T              |
| 1024 | 1 | 2 | 15/16  | 0.2965 | 0.2965 | 2.8115 | UPSP:NUCL_HUMAN  | 5  | K.NDLAVVDVR.I             |
| 2446 | 1 | 3 | 24/88  | 0.0669 | 0.0669 | 3.5139 | UPSP:NUCL_HUMAN  | 5  | K.OKVEGTEPTAFNLFVGNLNF    |
| 0552 | 1 | 2 | 14/22  | 0.0998 | 0.0998 | 1.9971 | UPSP:NUCL_HUMAN  | 6  | K.TEADAKEKTEFK.Q          |
| 2678 | 1 | 2 | 25/42  | 0.5219 | 0.5219 | 5.6765 | UPSP:NUCL_HUMAN  | 6  | K.TLVLSNLSYSATEETLQEVFEK  |
| 2590 | 1 | 3 | 37/80  | 0.4432 | 0.4432 | 5.2581 | UPSP:NUCL_HUMAN  | 5  | K.VEGTEPTAFNLFVGNLNF.NK.  |
| 0012 | 1 | 2 | 10/12  | 0.0344 | 0.0344 | 2.2444 | UPSP:NUCL_HUMAN  | 5  | K.VTODELKE                |
| 2203 | 1 | 2 | 24/32  | 0.4983 | 0.4983 | 5.2701 | UPSP:NUCL_HUMAN  | 5  | K.VTODELKEVFDEAAEIR.L     |
| 2185 | 1 | 2 | 15/32  | 0.0326 | 0.0326 | 2.2781 | UPSP:MCCA_HUMAN  | 3  | K.AVNYVAGTVFEFIMDSK.H     |
| 1778 | 1 | 2 | 17/22  | 0.4161 | 0.4161 | 3.0950 | UPSP:MCCA_HUMAN  | 3  | K.EGSEIDIPVPK.Y           |
| 1582 | 1 | 3 | 35/68  | 0.4293 | 0.4293 | 5.6972 | UPSP:MCCA_HUMAN  | 3  | K.IPLSQEETLQGHAFEAR.I     |
| 2005 | 1 | 2 | 19/28  | 0.4779 | 0.4779 | 4.0080 | UPSP:MCCA_HUMAN  | 2  | K.QEGHIFIGPPPSAIR.D       |
| 1222 | 1 | 3 | 25/92  | 0.0834 | 0.0834 | 3.1052 | UPSP:MCCA_HUMAN  | 3  | K.YLSSVSSQEQTGGGLPAM*GTI  |
| 1820 | 1 | 3 | 39/92  | 0.4120 | 0.4120 | 5.6624 | UPSP:MCCA_HUMAN  | 3  | R.IY AEDPSNFM*PVAGPLVHLS  |
| 2156 | 1 | 3 | 33/92  | 0.3192 | 0.3192 | 4.5049 | UPSP:MCCA_HUMAN  | 3  | R.IY AEDPSNFM*PVAGPLVHLS  |
| 1113 | 1 | 2 | 20/24  | 0.4160 | 0.4160 | 4.9136 | UPSP:MCCA_HUMAN  | 2  | R.SEQEQEQLESAR.R          |
| 0620 | 1 | 2 | 19/30  | 0.1118 | 0.1118 | 2.5035 | UPSP:BRE1B_HUMAN | 6  | K.EM*APVPGTTTTTTSVK.K     |
| 1444 | 1 | 3 | 28/64  | 0.2667 | 0.2667 | 5.2207 | UPSP:BRE1B_HUMAN | 8  | K.LLREFEKDELGEQVILGLK.S   |
| 1115 | 1 | 2 | 18/22  | 0.3676 | 0.3676 | 3.6151 | UPSP:BRE1B_HUMAN | 7  | K.SQVDAQLLTVQK.L          |
| 1952 | 1 | 2 | 21/32  | 0.4560 | 0.4560 | 4.6472 | UPSP:BRE1B_HUMAN | 4  | K.VLEM*ETTVEDLQWDIEK.L    |
| 1521 | 1 | 2 | 22/30  | 0.3645 | 0.3645 | 3.4267 | UPSP:BRE1B_HUMAN | 6  | R.EGPSLGPVPPVASALSRA      |
| 1267 | 1 | 2 | 18/20  | 0.3533 | 0.3533 | 2.7819 | UPSP:BRE1B_HUMAN | 4  | R.ISLEYSLODK.V            |
| 2087 | 1 | 3 | 33/76  | 0.3692 | 0.3692 | 5.3779 | UPSP:BRE1B_HUMAN | 8  | R.KVEVYADAEHLOEIEKEYK.A   |
| 1088 | 1 | 2 | 15/20  | 0.1502 | 0.1502 | 2.6961 | UPSP:BRE1B_HUMAN | 4  | R.LQDLATLQEK.H            |
| 1382 | 1 | 2 | 16/18  | 0.4131 | 0.4131 | 2.9936 | UPSP:FBXW8_HUMAN | 1  | K.ILVYSLEAGR.R            |
| 2001 | 1 | 2 | 19/30  | 0.4872 | 0.4872 | 4.6015 | UPSP:FBXW8_HUMAN | 1  | K.IVSGGEEGLVSVVDYR.M      |
| 1799 | 1 | 2 | 17/22  | 0.2902 | 0.2902 | 2.9846 | UPSP:FBXW8_HUMAN | 1  | K.LVQYLEIVPETR.R          |
| 1784 | 1 | 2 | 18/20  | 0.3156 | 0.3156 | 3.7356 | UPSP:FBXW8_HUMAN | 5  | K.VIADEVLWYR.L            |
| 1804 | 1 | 2 | 17/28  | 0.1437 | 0.1437 | 2.4311 | UPSP:FBXW8_HUMAN | -  | R.EGAGGGEQLVDQLIR.D       |
| 0792 | 1 | 2 | 17/20  | 0.2969 | 0.2969 | 3.3667 | UPSP:FBXW8_HUMAN | 1  | R.NADLDSFTTHR.R           |
| 1264 | 1 | 3 | 24/52  | 0.3944 | 0.3944 | 3.7549 | UPSP:FBXW8_HUMAN | 1  | R.SGNIALSLSAHQLR.V        |
| 2110 | 1 | 2 | 21/28  | 0.4034 | 0.4034 | 3.8415 | UPSP:PYC_HUMAN   | 2  | K.DFTAIFGLDLSLNR.L        |
| 2259 | 1 | 2 | 19/30  | 0.2481 | 0.2481 | 3.6103 | UPSP:PYC_HUMAN   | 2  | K.IVGDLAQFMVQNGLSR.A      |
| 2562 | 1 | 2 | 16/24  | 0.3410 | 0.3410 | 2.4562 | UPSP:PYC_HUMAN   | 1  | R.ELIPNIPFOM*LLR.G        |
| 2375 | 1 | 3 | 43/92  | 0.4751 | 0.4751 | 6.6618 | UPSP:PYC_HUMAN   | 2  | R.HGEEVTPEDVLSAAM*YPDVF   |

|      |   |   |        |        |        |        |                   |    |                             |
|------|---|---|--------|--------|--------|--------|-------------------|----|-----------------------------|
| 2606 | 1 | 3 | 29/84  | 0.3943 | 0.3943 | 3.6557 | UPSP:PYC_HUMAN    | 2  | R.SVVEFLQGYIGVPHGGFPEPFR    |
| 1763 | 1 | 2 | 16/22  | 0.2812 | 0.2812 | 2.9399 | UPSP:PYC_HUMAN    | 2  | R.VFDYSEYWEGAR.G            |
| 2356 | 1 | 3 | 32/84  | 0.3667 | 0.3667 | 5.3157 | UPSP:HNRPU_HUMAN  | 9  | K.EKPYFPPEEYTFIQNVPLEDR.A   |
| 1883 | 1 | 2 | 20/34  | 0.3286 | 0.3286 | 2.5655 | UPSP:HNRPU_HUMAN  | 5  | K.SSGPTSLFAVTVAPPGAR.Q      |
| 1300 | 1 | 2 | 18/22  | 0.3521 | 0.3521 | 3.5264 | UPSP:HNRPU_HUMAN  | 9  | K.YNII.GTNTIM*DK.M          |
| 1467 | 1 | 2 | 12/18  | 0.1169 | 0.1169 | 1.9407 | UPSP:HNRPU_HUMAN  | 7  | R.GYFEYIEENK.Y              |
| 1400 | 1 | 2 | 19/24  | 0.3944 | 0.3944 | 3.7037 | UPSP:HNRPU_HUMAN  | 7  | R.GYFEYIEENKYSR.A           |
| 1407 | 1 | 2 | 24/28  | 0.4174 | 0.4174 | 4.2895 | UPSP:HNRPU_HUMAN  | 9  | R.NFILDQTNVSSAAAQR.R        |
| 0674 | 1 | 2 | 11/14  | 0.1399 | 0.1399 | 1.9509 | UPSP:RS2_HUMAN    | 7  | K.ATFDAISK.T                |
| 0799 | 1 | 2 | 12/14  | 0.1176 | 0.1176 | 2.0209 | UPSP:RS2_HUMAN    | 6  | K.I.SIVPVR.R.G              |
| 2612 | 1 | 2 | 19/24  | 0.3807 | 0.3807 | 4.5371 | UPSP:RS2_HUMAN    | 7  | K.SLFEIYI.FSL.PIK.E         |
| 1447 | 1 | 3 | 26/44  | 0.3816 | 0.3816 | 3.2863 | UPSP:RS2_HUMAN    | 7  | K.SPYQEFIDHLVK.T            |
| 1975 | 1 | 2 | 15/20  | 0.4989 | 0.4989 | 3.0697 | UPSP:RS2_HUMAN    | 8  | K.TYSYL.IPDL.WK.E           |
| 0786 | 1 | 2 | 13/20  | 0.2714 | 0.2714 | 2.4887 | UPSP:RS2_HUMAN    | 5  | R.GTGIVSAPVVK.K             |
| 1154 | 1 | 3 | 37/68  | 0.4450 | 0.4450 | 5.9912 | UPTR:Q59FY4_HUMAN | 3  | K.IHNANPEL.TDGOIQAM*LR.R    |
| 2038 | 1 | 2 | 21/30  | 0.4453 | 0.4453 | 4.7449 | UPTR:Q59FY4_HUMAN | 3  | K.IIQOAGQVWEPDSAFK.T        |
| 1752 | 1 | 2 | 19/22  | 0.3141 | 0.3141 | 4.1260 | UPTR:Q59FY4_HUMAN | 3  | R.DIIIVGNDITYR.I            |
| 0781 | 1 | 2 | 18/20  | 0.2929 | 0.2929 | 2.6776 | UPTR:Q59FY4_HUMAN | 3  | R.I.GTPEL.STAER.K           |
| 1695 | 1 | 2 | 20/34  | 0.2848 | 0.2848 | 3.3640 | UPTR:Q59FY4_HUMAN | 3  | R.TVELSIPADPANLDSEAK.I      |
| 1653 | 1 | 2 | 17/22  | 0.2778 | 0.2778 | 3.2409 | UPSP:HSP7C_HUMAN  | 4  | K.DAGTIAGL.NVLR.I           |
| 0980 | 1 | 2 | 22/28  | 0.3766 | 0.3766 | 4.5899 | UPSP:HSP7C_HUMAN  | 3  | K.NQVAM*NPTNTV.FDAK.R       |
| 1989 | 1 | 3 | 35/92  | 0.5067 | 0.5067 | 5.4118 | UPSP:HSP7C_HUMAN  | 5  | K.QTQTFITYSDNQPGVLIQVYEC    |
| 1618 | 1 | 2 | 22/26  | 0.4121 | 0.4121 | 3.8951 | UPSP:HSP7C_HUMAN  | 4  | K.SFYPEEVSSM*VLT.K.M        |
| 1692 | 1 | 2 | 15/34  | 0.3500 | 0.3500 | 2.9987 | UPSP:HSP7C_HUMAN  | 4  | K.TVINA.VVTV.PAYF.NDSOR.Q   |
| 1707 | 1 | 2 | 16/18  | 0.3086 | 0.3086 | 3.8285 | UPSP:RLA0_HUMAN   | 6  | K.IIQLLDDYPK.C              |
| 2244 | 1 | 2 | 20/22  | 0.4415 | 0.4415 | 4.1890 | UPSP:RLA0_HUMAN   | 5  | K.TSFFQALGITK.I             |
| 1341 | 1 | 2 | 14/16  | 0.3370 | 0.3370 | 2.6663 | UPSP:RLA0_HUMAN   | 6  | R.GNVGVFVTK.E               |
| 2234 | 1 | 2 | 16/24  | 0.2969 | 0.2969 | 3.8690 | UPSP:RLA0_HUMAN   | 4  | R.GTIEL.SDVLIK.T            |
| 2236 | 1 | 2 | 22/32  | 0.5419 | 0.5419 | 5.0053 | UPSP:RLA0_HUMAN   | 7  | R.VLALSVEIDYTFPLAEK.V       |
| 1874 | 1 | 3 | 28/68  | 0.2854 | 0.2854 | 3.6379 | UPSP:DECR_HUMAN   | -  | K.FDGGEFVLISGEFNDLRK.V      |
| 2570 | 1 | 2 | 22/50  | 0.3600 | 0.3600 | 4.2523 | UPSP:DECR_HUMAN   | 1  | K.GAAFLSITITLYAETGSGFVVPSPA |
| 1253 | 1 | 2 | 20/24  | 0.2538 | 0.2538 | 3.5689 | UPSP:DECR_HUMAN   | 2  | K.VAFTGGGTGLGK.G            |
| 1499 | 1 | 3 | 32/84  | 0.4068 | 0.4068 | 5.1742 | UPSP:DECR_HUMAN   | 2  | K.VAGHPNIVINNAAGNFISPTER    |
| 1326 | 1 | 2 | 14/18  | 0.0860 | 0.0860 | 2.6367 | UPSP:DECR_HUMAN   | 1  | R.FNVIQPGPK.T               |
| 1156 | 1 | 2 | 16/20  | 0.1874 | 0.1874 | 3.0881 | UPSP:RL7A_HUMAN   | 4  | K.NFGGQDIQPK.R              |
| 1953 | 1 | 2 | 21/26  | 0.4256 | 0.4256 | 4.2846 | UPSP:RL7A_HUMAN   | 4  | K.VPPAINQFTQALDR.Q          |
| 1249 | 1 | 2 | 18/24  | 0.4388 | 0.4388 | 4.1237 | UPSP:RL7A_HUMAN   | 6  | R.AGVNTVTI.VENK.K           |
| 1021 | 1 | 3 | 23/52  | 0.3801 | 0.3801 | 3.6706 | UPSP:RL7A_HUMAN   | 6  | R.AGVNTVTI.VENK.A           |
| 2086 | 1 | 3 | 24/60  | 0.1538 | 0.1538 | 3.0081 | UPSP:RL7A_HUMAN   | 4  | R.LKVPAINQFTQALDR.Q         |
| 0519 | 1 | 2 | 14/16  | 0.2606 | 0.2606 | 2.6065 | UPSP:NPM_HUMAN    | 18 | K.GPSSVEDIK.A               |
| 2471 | 1 | 2 | 26/40  | 0.6455 | 0.6455 | 5.7557 | UPSP:NPM_HUMAN    | 20 | K.M*SVQPTVSLGGFEITPPVVL.R   |
| 2262 | 1 | 2 | 20/26  | 0.3127 | 0.3127 | 4.0045 | UPSP:NPM_HUMAN    | 11 | R.M*TDQEAIQDLWQWR.K         |
| 2048 | 1 | 3 | 28/108 | 0.3927 | 0.3927 | 4.7000 | UPSP:NPM_HUMAN    | 18 | R.TVSLGAGAKDELHIVEAEAM*     |
| 1806 | 1 | 2 | 22/36  | 0.4033 | 0.4033 | 3.9203 | UPTR:Q7Z561_HUMAN | 3  | K.DVDDGLQAAEEVGYVPM*IK./    |
| 1938 | 1 | 3 | 28/88  | 0.3254 | 0.3254 | 3.2963 | UPTR:Q7Z561_HUMAN | 3  | K.GYVKDVEDDGLQAAEEVGYPV/    |
| 2371 | 1 | 3 | 40/108 | 0.4386 | 0.4386 | 4.8472 | UPTR:Q7Z561_HUMAN | 3  | K.M*ADHYVPPVGGPNNNNYAN/     |
| 1577 | 1 | 3 | 25/52  | 0.3952 | 0.3952 | 3.3682 | UPTR:Q7Z561_HUMAN | 1  | R.QVLIASHL.PSYELR.H         |
| 0850 | 1 | 2 | 13/14  | 0.0937 | 0.0937 | 2.5458 | UPTR:Q6NXR8_HUMAN | 2  | K.APAM*FNIR.N               |
| 0888 | 1 | 2 | 12/14  | 0.2613 | 0.2613 | 2.7062 | UPTR:Q6NXR8_HUMAN | 2  | K.TTDGYLLR.L                |
| 2334 | 1 | 2 | 24/32  | 0.6045 | 0.6045 | 5.1723 | UPTR:Q6NXR8_HUMAN | 2  | R.VFEVSLADLQNDVAFR.K        |
| 2130 | 1 | 3 | 29/68  | 0.2797 | 0.2797 | 3.8576 | UPTR:Q6NXR8_HUMAN | 2  | R.VFEVSLADLQNDVAFR.K.F      |
| 0950 | 1 | 2 | 13/14  | 0.1906 | 0.1906 | 2.6791 | UPSP:RL3_HUMAN    | 9  | K.JGGQYLK.D                 |
| 2361 | 1 | 3 | 31/84  | 0.3941 | 0.3941 | 3.8369 | UPSP:RL3_HUMAN    | 9  | K.SINPLGGFVHYGEVNTDFVM*1    |
| 1939 | 1 | 3 | 37/100 | 0.4700 | 0.4700 | 4.7769 | UPSP:RL3_HUMAN    | 10 | R.ERLEQOVVNVQVFGODEM*ID/    |
| 1078 | 1 | 2 | 14/16  | 0.3419 | 0.3419 | 2.9688 | UPSP:RL3_HUMAN    | 6  | R.HGSLGFLPR.K               |
| 1371 | 1 | 2 | 20/24  | 0.3720 | 0.3720 | 3.6805 | UPTR:Q53HV1_HUMAN | 3  | K.VNDTIQIDLETGK.I           |
| 1656 | 1 | 2 | 15/16  | 0.1896 | 0.1896 | 3.3526 | UPTR:Q53HV1_HUMAN | 3  | R.I.SNIFVIGK.G              |
| 2055 | 1 | 2 | 17/32  | 0.3737 | 0.3737 | 3.9898 | UPTR:Q53HV1_HUMAN | 3  | R.TDITYPAGFM*DVISIDK.T      |
| 2642 | 1 | 2 | 27/32  | 0.5605 | 0.5605 | 6.1024 | UPSP:PCCB_HUMAN   | 6  | R.IQFVESLAGYADIFLR.N        |
| 0453 | 1 | 2 | 14/24  | 0.2505 | 0.2505 | 2.2188 | UPSP:PCCB_HUMAN   | 5  | R.KAYGGAYDVM*SSK.H          |
| 2112 | 1 | 2 | 16/28  | 0.0880 | 0.0880 | 2.6168 | UPSP:PCCB_HUMAN   | 6  | R.LVPELDTIVPLESIK.A         |
| 1382 | 1 | 3 | 23/52  | 0.2885 | 0.2885 | 3.0066 | UPSP:HSP71_HUMAN  | 6  | K.HWPFQVINDGDKPK.V          |
| 1343 | 1 | 2 | 22/28  | 0.4618 | 0.4618 | 4.1652 | UPSP:HSP71_HUMAN  | 5  | K.NQVALNPQNTV.FDAK.R        |
| 1805 | 1 | 2 | 19/30  | 0.4619 | 0.4619 | 3.5692 | UPSP:HSP71_HUMAN  | 9  | R.IINEPTAAAIAYGLDR.T        |
| 2682 | 1 | 2 | 17/28  | 0.3169 | 0.3169 | 2.9151 | UPSP:ECHA_HUMAN   | 3  | K.ADM*VIEAVFEDLSLK.H        |
| 2662 | 1 | 3 | 26/108 | 0.2977 | 0.2977 | 3.6093 | UPSP:ECHA_HUMAN   | 2  | K.KLDSLTSFSGFPVGAATLVDEY    |

|      |   |   |        |        |        |        |                   |    |                            |
|------|---|---|--------|--------|--------|--------|-------------------|----|----------------------------|
| 1770 | 1 | 2 | 18/28  | 0.4445 | 0.4445 | 3.2920 | UPSP:ECHA_HUMAN   | 3  | R.FGGGNPELLTOMVSK.G        |
| 0502 | 1 | 2 | 19/20  | 0.2434 | 0.2434 | 4.0519 | UPSP:RL4_HUMAN    | 3  | K.AAAAAAQAQ.S              |
| 1302 | 1 | 2 | 16/18  | 0.3121 | 0.3121 | 3.1547 | UPSP:RL4_HUMAN    | 5  | R.KLDLTYGTR.K              |
| 1912 | 1 | 2 | 19/22  | 0.4791 | 0.4791 | 2.5720 | UPSP:RL4_HUMAN    | 5  | R.NIPGITLLNVSK.L           |
| 1889 | 1 | 2 | 20/28  | 0.4261 | 0.4261 | 3.5512 | UPSP:RS24_HUMAN   | 2  | K.TTGGFM*YDSDLYAK.K        |
| 2189 | 1 | 2 | 16/28  | 0.2150 | 0.2150 | 2.6695 | UPSP:RS24_HUMAN   | 2  | K.TTGGFMIDSLDYAK.K         |
| 2579 | 1 | 2 | 17/22  | 0.2631 | 0.2631 | 2.7347 | UPSP:RS24_HUMAN   | 2  | K.TTPDVFVFGFR.T            |
| 1231 | 1 | 2 | 14/22  | 0.0081 | 0.0081 | 2.6795 | UPSP:H12_HUMAN    | 6  | K.ASGPPVSELITK.A           |
| 0967 | 1 | 3 | 25/48  | 0.2636 | 0.2636 | 3.9644 | UPSP:H12_HUMAN    | 6  | R.KASGPPVSELITK.A          |
| 1104 | 1 | 2 | 15/16  | 0.0220 | 0.0220 | 2.2713 | UPSP:H12_HUMAN    | 6  | R.SGVSAAALK.K              |
| 2542 | 1 | 2 | 21/32  | 0.3624 | 0.3624 | 4.7810 | UPSP:RL6_HUMAN    | 5  | K.QLASGLLVGTGPLVLR.V       |
| 2803 | 1 | 2 | 21/28  | 0.5225 | 0.5225 | 4.6157 | UPSP:RL6_HUMAN    | 6  | R.ASITPGTILJLITGR.H        |
| 2187 | 1 | 2 | 23/28  | 0.4155 | 0.4155 | 5.0489 | UPSP:TBA6_HUMAN   | 8  | R.AVFDLEPTVIDEVR.T         |
| 2644 | 1 | 2 | 19/26  | 0.4719 | 0.4719 | 4.0429 | UPSP:TBA6_HUMAN   | 8  | R.LISQVSSITASLR.F          |
| 1959 | 1 | 2 | 25/38  | 0.5911 | 0.5911 | 6.0315 | UPSP:TBA2_HUMAN   | 15 | K.TIGGGDDSFNTFFSETGAGK.H   |
| 1601 | 1 | 2 | 15/34  | 0.3359 | 0.3359 | 2.8232 | UPSP:TBA2_HUMAN   | 21 | K.VGNYOPPTVPPGGDLAK.V      |
| 1779 | 1 | 2 | 26/30  | 0.0255 | 0.0255 | 5.1493 | UPSP:GRP78_HUMAN  | 18 | R.IINEPTAAAAYGLDK.R        |
| 0603 | 1 | 2 | 19/20  | 0.2454 | 0.2454 | 3.6714 | UPSP:GRP78_HUMAN  | 26 | R.VEIHANDQGNRI             |
| 0517 | 1 | 2 | 21/32  | 0.5582 | 0.5582 | 4.7034 | UPTR:Q96FW6_HUMAN | 8  | K.OGVSQSATAQQPVTADK.Q      |
| 1555 | 1 | 3 | 28/96  | 0.4667 | 0.4667 | 4.0531 | UPTR:Q96FW6_HUMAN | 8  | R.ISTPOTNTVPIPLISTPPVSSQPI |
| 1916 | 1 | 2 | 16/26  | 0.3237 | 0.3237 | 3.3117 | UPSP:G3P_HUMAN    | 4  | K.LISWYDNEFGYSNR.V         |
| 2392 | 1 | 3 | 33/92  | 0.4709 | 0.4709 | 5.1238 | UPSP:G3P_HUMAN    | 5  | K.VIHDNFGVEGLM*TTVHAITA    |
| 1434 | 1 | 2 | 19/20  | 0.3255 | 0.3255 | 3.4854 | UPSP:RL7_HUMAN    | 6  | R.IALTDNALIAR.S            |
| 2163 | 1 | 2 | 20/26  | 0.4475 | 0.4475 | 4.2653 | UPSP:RL7_HUMAN    | 7  | R.IVEPYIAWGYPNLK.S         |
| 1098 | 1 | 2 | 15/20  | 0.3329 | 0.3329 | 2.8174 | UPTR:Q9BS10_HUMAN | 2  | -LTPPEEEILNK.K             |
| 1427 | 1 | 2 | 18/24  | 0.3929 | 0.3929 | 4.5049 | UPTR:Q9BS10_HUMAN | 2  | K.ISSLLEEQFQOQK.L          |
| 0944 | 1 | 2 | 18/24  | 0.4262 | 0.4262 | 3.4422 | UPTR:Q6IPX9_HUMAN | 5  | R.ELAEDGYSGVEVR.V          |
| 1867 | 1 | 2 | 22/26  | 0.4260 | 0.4260 | 3.7986 | UPTR:Q6IPX9_HUMAN | 5  | R.FGPEGSVELYAEK.V          |
| 2221 | 1 | 2 | 16/34  | 0.3061 | 0.3061 | 3.3998 | UPSP:RL21_HUMAN   | 4  | R.TNGKEPELLIPIPYEFM*A.-    |
| 1185 | 1 | 2 | 19/28  | 0.2666 | 0.2666 | 3.7074 | UPSP:RL21_HUMAN   | 4  | R.VYNTVOHAVGIVVNK.Q        |
| 1836 | 1 | 2 | 17/38  | 0.3107 | 0.3107 | 3.0159 | UPSP:SYR_HUMAN    | 2  | K.AAYPDLENPPLVTPSQQAK.F    |
| 1376 | 1 | 2 | 20/30  | 0.3539 | 0.3539 | 3.7399 | UPSP:SYR_HUMAN    | 3  | K.SDGGYTYDTSDLAAIK.Q       |
| 1152 | 1 | 2 | 13/16  | 0.3897 | 0.3897 | 2.5476 | UPTR:Q59F19_HUMAN | 2  | K.IGPLGLSPK.K              |
| 1933 | 1 | 2 | 18/30  | 0.1921 | 0.1921 | 3.9486 | UPTR:Q59F19_HUMAN | 1  | R.QAQIEVVPVSASALIK.A       |
| 1273 | 1 | 2 | 17/24  | 0.2835 | 0.2835 | 3.1115 | UPTR:Q9NQ8_HUMAN  | 5  | K.DEILPTPISEQK.G           |
| 0660 | 1 | 2 | 14/30  | 0.1878 | 0.1878 | 2.9595 | UPTR:Q9NQ8_HUMAN  | 4  | K.GGKPEPPAM*POPVPTA.-      |
| 2690 | 1 | 2 | 16/20  | 0.3394 | 0.3394 | 3.2514 | GP:M77233_1       | 1  | K.DVNFPEPFQI.-             |
| 2182 | 1 | 2 | 13/24  | 0.2226 | 0.2226 | 2.6203 | GP:M77233_1       | 1  | R.KAIIHFVPPVPLK.S          |
| 1089 | 1 | 2 | 12/14  | 0.1944 | 0.1944 | 2.4924 | UPSP:RS9_HUMAN    | 4  | K.LIGEYGLR.N               |
| 1464 | 1 | 2 | 13/16  | 0.2670 | 0.2670 | 2.8330 | UPSP:RS9_HUMAN    | 3  | R.LFFGNALLR                |
| 2353 | 1 | 3 | 40/100 | 0.3948 | 0.3948 | 6.7380 | UPTR:Q6LC01_HUMAN | 14 | R.SGPFQIFRPDNFVFGSGAGN     |
| 2563 | 1 | 2 | 22/30  | 0.4630 | 0.4630 | 5.6777 | UPSP:TCPE_HUMAN   | 3  | K.LGFAGLVQFISFGTK.D        |
| 2760 | 1 | 2 | 21/40  | 0.3747 | 0.3747 | 5.3964 | UPSP:AP2B1_HUMAN  | 2  | K.LAPPLVTLISGPEVQYVALR.I   |
| 0605 | 1 | 2 | 25/30  | 0.5115 | 0.5115 | 5.3071 | UPSP:MAGB2_HUMAN  | 2  | R.APTAAAAAGVSSTK.S         |
| 1492 | 1 | 2 | 23/28  | 0.5035 | 0.5035 | 5.1948 | UPSP:RS6_HUMAN    | 6  | R.M*ATEVAADALGEEWK.G       |
| 1887 | 1 | 2 | 19/22  | 0.4911 | 0.4911 | 4.9522 | UPSP:RL14_HUMAN   | 9  | K.LVAIVDVIDQNR.A           |
| 2009 | 1 | 2 | 23/36  | 0.5832 | 0.5832 | 4.9048 | UPSP:RL9_HUMAN    | 1  | K.TILSNQTVDIPENVDTILK.G    |
| 1979 | 1 | 2 | 22/30  | 0.4302 | 0.4302 | 4.7423 | UPTR:Q6NZ54_HUMAN | 1  | K.GLDVDSLVIHQVYK.A         |
| 2217 | 1 | 3 | 28/80  | 0.3529 | 0.3529 | 4.6446 | UPTR:O75147_HUMAN | 1  | K.NTVLLTWKPPPEPAPETPFYR.L  |
| 2345 | 1 | 2 | 21/32  | 0.4657 | 0.4657 | 4.6122 | UPSP:SDPR_HUMAN   | 1  | K.VLIFQEENEIPASVFK.Q       |
| 2585 | 1 | 2 | 21/26  | 0.4283 | 0.4283 | 4.5875 | UPSP:LA_HUMAN     | 1  | R.LTDFNVIVEALSK.S          |
| 1380 | 1 | 2 | 22/24  | 0.3537 | 0.3537 | 4.5672 | UPSP:RL10_HUMAN   | 9  | K.FNADEFEDM*VAEK.R         |
| 1597 | 1 | 2 | 22/28  | 0.5120 | 0.5120 | 4.5378 | UPTR:Q5JR95_HUMAN | 1  | R.IIDVVYNASNNELVR.T        |
| 2310 | 1 | 3 | 35/84  | 0.3552 | 0.3552 | 4.4775 | UPSP:RS17_HUMAN   | 2  | K.LLDFGSLSNLQVTOPTVGM*NI   |
| 2508 | 1 | 2 | 19/30  | 0.3878 | 0.3878 | 4.4047 | UPTR:Q6ICQ4_HUMAN | 2  | K.AAGVNVPEFPWGLFAK.A       |
| 2342 | 1 | 3 | 35/72  | 0.3121 | 0.3121 | 4.4015 | GP:X60020_1       | -  | R.RPILDTITLEDSSGNLLGR.N    |
| 2272 | 1 | 2 | 19/24  | 0.4065 | 0.4065 | 4.3194 | UPSP:MDM2_HUMAN   | 9  | K.EVLVLYGQYIM*TK.R         |
| 1163 | 1 | 2 | 17/24  | 0.2584 | 0.2584 | 4.3006 | UPSP:COA2_HUMAN   | 9  | K.EASFEYLONEGER.L          |
| 2628 | 1 | 3 | 32/84  | 0.3700 | 0.3700 | 4.2698 | UPTR:Q59FS3_HUMAN | 2  | R.TLTAVHDAILEDLVFPSEIVGK.  |
| 1439 | 1 | 2 | 24/32  | 0.5105 | 0.5105 | 4.2348 | UPTR:Q53G49_HUMAN | 5  | K.VWLDPNETNEIANANSR.Q      |
| 2173 | 1 | 3 | 37/96  | 0.4521 | 0.4521 | 4.1664 | UPSP:IF2G_HUMAN   | 4  | K.IVSLFAEHNDLQYAAPGGLIGV   |
| 2777 | 1 | 2 | 21/40  | 0.5114 | 0.5114 | 4.0867 | UPSP:DDX1_HUMAN   | 1  | R.FLVLDEADGLLSQGSDFINR.M   |
| 1484 | 1 | 2 | 21/32  | 0.5016 | 0.5016 | 4.0822 | UPSP:DBPA_HUMAN   | 13 | R.SVGDETVEFVVEGEK.G        |
| 2148 | 1 | 2 | 19/28  | 0.4273 | 0.4273 | 4.0536 | UPSP:H2B1B_HUMAN  | 33 | K.AM*GIM*NSFVNDIFER.I      |
| 1980 | 1 | 2 | 21/28  | 0.5520 | 0.5520 | 4.0073 | UPTR:Q6PB27_HUMAN | 1  | K.HSGNITFDEIVNIAR.Q        |
| 2051 | 1 | 2 | 20/30  | 0.4046 | 0.4046 | 3.9981 | UPSP:TCPD_HUMAN   | 3  | R.ALIAGGGAPEIELAR.L        |

|      |   |   |       |        |        |        |                   |    |                           |
|------|---|---|-------|--------|--------|--------|-------------------|----|---------------------------|
| 1426 | 1 | 3 | 31/76 | 0.3553 | 0.3553 | 3.9849 | UPSP:SYD_HUMAN    | 6  | R.LPQLDDAVRPEAEGFEEFGR.A  |
| 2252 | 1 | 2 | 18/26 | 0.3502 | 0.3502 | 3.8803 | UPTR:Q6IRZ0_HUMAN | 1  | K.ILYTLVITYVPVITFK.S      |
| 0665 | 1 | 2 | 18/30 | 0.4131 | 0.4131 | 3.8791 | UPSP:HSP72_HUMAN  | 8  | K.STAGDTHLGGEDFDNR.M      |
| 1881 | 1 | 3 | 30/92 | 0.1680 | 0.1680 | 3.8397 | UPTR:Q5VTE0_HUMAN | 22 | R.VETGVLPKPGM*VVTFAPVNV.T |
| 1354 | 1 | 2 | 18/22 | 0.4434 | 0.4434 | 3.7650 | UPSP:KCI1AL_HUMAN | 8  | K.TVLM*LADQM*ISR.I        |
| 0603 | 1 | 2 | 19/20 | 0.2454 | 0.2454 | 3.6714 | UPSP:HSP76_HUMAN  | 3  | R.VEILANDQGNR.T           |
| 1662 | 1 | 2 | 18/24 | 0.3336 | 0.3336 | 3.6204 | UPTR:Q1JQ76_HUMAN | 4  | K.KYDAFLASESLIK.Q         |
| 2634 | 1 | 2 | 20/24 | 0.2686 | 0.2686 | 3.5966 | UPSP:HNRPQ_HUMAN  | 10 | R.DLFEDELVPLFEK.A         |
| 2205 | 1 | 2 | 20/28 | 0.4041 | 0.4041 | 3.5878 | UPTR:Q5JP53_HUMAN | 5  | R.ALTVPELTQQVFDK.N        |
| 1287 | 1 | 2 | 19/24 | 0.3500 | 0.3500 | 3.5772 | GP:AE006463_8     | 3  | R.LAPDYDALDVANK.I         |
| 1609 | 1 | 2 | 18/26 | 0.2954 | 0.2954 | 3.5572 | UPSP:HS90A_HUMAN  | 20 | R.GVVDSDELPLNISR.E        |
| 1773 | 1 | 2 | 18/30 | 0.3901 | 0.3901 | 3.5001 | UPSP:MDM4_HUMAN   | 3  | R.EDEDLIENLAQDETSRL       |
| 1227 | 1 | 2 | 18/24 | 0.3775 | 0.3775 | 3.4994 | UPSP:HS70L_HUMAN  | 27 | R.TTTPSYVAFTDTER.I        |
| 1358 | 1 | 2 | 18/20 | 0.4155 | 0.4155 | 3.4970 | UPSP:PCCA_HUMAN   | 4  | R.M*ADALDNYVIR.G          |
| 0385 | 1 | 2 | 18/28 | 0.4106 | 0.4106 | 3.4779 | UPSP:TCPB_HUMAN   | 4  | R.AAHSEGNITTAGLDM*R.E     |
| 2049 | 1 | 3 | 20/80 | 0.1471 | 0.1471 | 3.3624 | UPSP:HNRPD_HUMAN  | 8  | K.IREYFGGFGEVESIELPM*DNK. |
| 1475 | 1 | 2 | 19/26 | 0.4819 | 0.4819 | 3.3607 | UPTR:Q5VVCS_HUMAN | 8  | K.VLEQLTGQTPVFSK.A        |
| 1678 | 1 | 2 | 17/36 | 0.3792 | 0.3792 | 3.3566 | UPTR:Q53EN9_HUMAN | 6  | K.HSSDASSLLPQNILSOTSR.H   |
| 2042 | 1 | 2 | 15/24 | 0.3959 | 0.3959 | 3.3510 | UPSP:RL18_HUMAN   | 3  | K.ILTFDQLALDSPK.G         |
| 1808 | 1 | 3 | 26/84 | 0.2092 | 0.2092 | 3.1020 | UPSP:SYK_HUMAN    | 2  | K.VTYHPDGPFGQAYDVDFTPPF   |
| 2054 | 1 | 2 | 16/38 | 0.1795 | 0.1795 | 3.1013 | UPTR:Q5JWB0_HUMAN | -  | R.QPMEPPMEPSGGEQEPGAVR.F  |
| 1083 | 1 | 2 | 16/24 | 0.3550 | 0.3550 | 3.0771 | UPSP:RL13_HUMAN   | 5  | K.LATQLTGPVM*PVR.N        |
| 1251 | 1 | 2 | 18/24 | 0.4349 | 0.4349 | 3.0693 | GP:AY891881_1     | -  | R.AITGASLADIM*AK.R        |
| 1736 | 1 | 2 | 19/30 | 0.3051 | 0.3051 | 2.8143 | UPSP:DHX9_HUMAN   | 3  | R.ELDALDANDELTP.LGR.I     |

# Supplementary Table S2. Affinity purification and mass spectrometry analysis of p53 in K562 cell.

GYGI LAB / TAPLIN BIOLOGICAL MASS SPEC FACILITY [SearchWiz](#) | [Status](#) | [Browse](#)

/home/www/production/html/saved\_sets/13234.2.sumlist

226 peptides, 44 proteins Charge states: 1+  2+  3+  4+  Sort: Reference  desc   html  text  dta Peptides  Reload

13234.2  Lookup   scan1  peptide  reference

Group 2/3+  Use best ion

Rank Sp

Charge

premass

M\_H

mass\_diff

R:  H:  Sequence:

R:  H:  Peptide type: tryptic

R:  H:  AA type: acidic

R:  H:  Mod AA type: acidic

XCorr 1+  Rank (1 to n):

XCorr 2+  Low PPM1:

XCorr 3+  High PPM1:

XCorr 4+  Low CalPPM:

dCn:  High CalPPM:

dCn2:  Vista Score:

Hide duplicate peptides

| Protein matches | scanf | Rank | charge            | ions | dCn | dCn2 | XCorr  | Reference | Redu   | Peptide |                 |                 |                            |                        |
|-----------------|-------|------|-------------------|------|-----|------|--------|-----------|--------|---------|-----------------|-----------------|----------------------------|------------------------|
| 52 52           | 3.473 | 0.00 | UPSP:CUL7_HUMAN   | 0723 | 1   | 2    | 15/18  | 0.3019    | 0.3019 | 2.8911  | UPSP:CUL7_HUMAN | 2               | K.AAHVSEQFAR.H             |                        |
| 21 21           | 3.853 | 0.00 | UPSP:PARC_HUMAN   | 0827 | 1   | 2    | 15/24  | 0.3441    | 0.3441 | 1.9936  | UPSP:CUL7_HUMAN | 2               | K.EPPSQSPNTP.LQR.L         |                        |
| 17 17           | 3.873 | 0.00 | UPSP:COA1_HUMAN   | 2350 | 1   | 2    | 26/34  | 0.5922    | 0.5922 | 6.1007  | UPSP:CUL7_HUMAN | 2               | K.ILLDLEQALSSEGTOENK.V     |                        |
| 14 14           | 3.682 | 0.00 | UPSP:BRE1A_HUMAN  | 1512 | 1   | 2    | 28/46  | 0.5441    | 0.5441 | 5.9527  | UPSP:CUL7_HUMAN | 2               | K.M*LGEDGVQIGVQSAGESAGEV.G |                        |
| 13 13           | 3.239 | 0.00 | UPSP:P53_HUMAN    | 1681 | 1   | 2    | 28/46  | 0.4561    | 0.4561 | 4.6185  | UPSP:CUL7_HUMAN | 2               | K.MLGEDGVQIGVQSAGESAGEV.G  |                        |
| 11 11           | 3.686 | 0.00 | UPSP:BRE1B_HUMAN  | 1935 | 1   | 2    | 17/20  | 0.3613    | 0.3613 | 3.3547  | UPSP:CUL7_HUMAN | 2               | K.QVNNFLTSSWR.D            |                        |
| 10 10           | 3.968 | 0.00 | UPSP:MCCA_HUMAN   | 2247 | 1   | 2    | 10/34  | 0.1638    | 0.1638 | 2.7660  | UPSP:CUL7_HUMAN | 2               | K.QVNNFLTSSWRDDDFVPR.Y     |                        |
| 9 9             | 4.036 | 0.00 | UPSP:MCCC2_HUMAN  | 0547 | 1   | 2    | 12/16  | 0.1432    | 0.1432 | 2.7252  | UPSP:CUL7_HUMAN | 2               | K.SQSHPALER.G              |                        |
| 9 9             | 3.278 | 0.00 | UPSP:PYC_HUMAN    | 0963 | 1   | 2    | 18/20  | 0.4060    | 0.4060 | 3.8740  | UPSP:CUL7_HUMAN | 2               | K.SVLEEM*ETDVK.S           |                        |
| 7 7             | 3.514 | 0.00 | UPSP:FBXW8_HUMAN  | 0498 | 1   | 2    | 13/16  | 0.2698    | 0.2698 | 2.3799  | UPSP:CUL7_HUMAN | 8               | K.VEVSSNPHR.A              |                        |
| 4 4             | 4.437 | 0.00 | UPSP:PCCB_HUMAN   | 1638 | 1   | 3    | 22/36  | 0.1779    | 0.1779 | 3.6968  | UPSP:CUL7_HUMAN | 2               | K.VKPLLLQLQR.Q             |                        |
| 4 4             | 3.312 | 0.00 | UPSP:HSP7C_HUMAN  | 0606 | 1   | 2    | 10/14  | 0.0878    | 0.0878 | 2.0723  | UPSP:CUL7_HUMAN | 2               | R.DTLQPGM*R.V              |                        |
| 4 4             | 3.568 | 0.00 | UPSP:PCCA_HUMAN   | 1899 | 1   | 2    | 18/22  | 0.3753    | 0.3753 | 3.9073  | UPSP:CUL7_HUMAN | 2               | R.DYAVVNLQLGAR.D           |                        |
| 4 4             | 2.941 | 0.00 | UPSP:HS70L_HUMAN  | 2856 | 1   | 2    | 18/22  | 0.2091    | 0.2091 | 4.1899  | UPSP:CUL7_HUMAN | 2               | R.EVLEQELIFFLHR.L          |                        |
| 3 3             | 3.016 | 0.00 | UPSP:NUCL_HUMAN   | 1532 | 1   | 2    | 22/24  | 0.3222    | 0.3222 | 2.9642  | UPSP:CUL7_HUMAN | 8               | R.FLPDDEAAQALGK.T          |                        |
| 3 3             | 3.879 | 0.00 | UPSP:RLA0_HUMAN   | 2502 | 1   | 2    | 12/14  | 0.0155    | 0.0155 | 2.4940  | UPSP:CUL7_HUMAN | 7               | R.FWPIQIR.I                |                        |
| 3 3             | 3.713 | 0.00 | UPTR:Q59FY4_HUMAN | 2693 | 1   | 2    | 21/30  | 0.4005    | 0.4005 | 4.0302  | UPSP:CUL7_HUMAN | 2               | R.GLEILGPKPTFWPVR.E        |                        |
| 3 3             | 3.653 | 0.00 | UPSP:NPM_HUMAN    | 1263 | 1   | 2    | 10/12  | 0.2178    | 0.2178 | 2.3655  | UPSP:CUL7_HUMAN | 2               | R.GPAFFSR.V                |                        |
| 3 3             | 3.626 | 0.00 | UPSP:DECR_HUMAN   | 0854 | 1   | 2    | 14/16  | 0.3603    | 0.3603 | 3.0840  | UPSP:CUL7_HUMAN | 2               | R.GPLDLHEQK.D              |                        |
| 3 3             | 3.493 | 0.00 | GP:M66870_1       | 2940 | 1   | 3    | 34/88  | 0.4889    | 0.4889 | 5.1395  | UPSP:CUL7_HUMAN | 2               | R.GOLELEFSM*AM*GTLISELVQ   |                        |
| 3 3             | 3.321 | 0.00 | UPTR:Q53EN9_HUMAN | 0584 | 1   | 2    | 16/18  | 0.1951    | 0.1951 | 3.5296  | UPSP:CUL7_HUMAN | 2               | R.HIDQIQGSR.I              |                        |
| 2 2             | 4.001 | 0.00 | UPSP:TCPE_HUMAN   | 0475 | 1   | 2    | 15/16  | 0.1562    | 0.1562 | 2.7356  | UPSP:CUL7_HUMAN | 2               | R.IGGAQEM*ER.L             |                        |
| 2 2             | 3.916 | 0.00 | UPSP:HSP72_HUMAN  | 1747 | 1   | 2    | 22/38  | 0.4079    | 0.4079 | 2.5795  | UPSP:CUL7_HUMAN | 2               | R.LIPQTYLQAEGEDGQNLK.R     |                        |
| 2 2             | 3.394 | 0.00 | UPSP:RS2_HUMAN    | 0751 | 1   | 1    | 9/12   | 0.1139    | 0.1139 | 2.1193  | UPSP:CUL7_HUMAN | 2               | R.LNDSALR.D                |                        |
| 1 1             | 5.334 | 0.00 | UPSP:HNRPU_HUMAN  | 1128 | 1   | 2    | 18/24  | 0.3925    | 0.3925 | 3.8407  | UPSP:CUL7_HUMAN | 2               | R.LPQOM*LOSLSTSK.E         |                        |
| 1 1             | 5.156 | 0.00 | UPSP:GRP78_HUMAN  | 1671 | 1   | 2    | 20/24  | 0.3200    | 0.3200 | 3.9312  | UPSP:CUL7_HUMAN | 2               | R.LPQOM*LOSLSTSK.E         |                        |
| 1 1             | 4.629 | 0.00 | UPSP:TBA6_HUMAN   | 0891 | 1   | 2    | 15/18  | 0.1122    | 0.1122 | 2.3226  | UPSP:CUL7_HUMAN | 2               | R.LVVEYGPAGK.I             |                        |
| 1 1             | 4.503 | 0.00 | UPSP:RL4_HUMAN    | 0759 | 1   | 2    | 19/24  | 0.3601    | 0.3601 | 3.8854  | UPSP:CUL7_HUMAN | 2               | R.M*IQALSSHDAGTR.T         |                        |
| 1 1             | 4.364 | 0.00 | UPTR:Q96FW6_HUMAN | 3066 | 1   | 2    | 12/32  | 0.0314    | 0.0314 | 1.6230  | UPSP:CUL7_HUMAN | 8               | R.M*LDDYFEISAGDEGFEFR.Q    |                        |
| 1 1             | 4.256 | 0.00 | UPSP:COA2_HUMAN   | 0868 | 1   | 2    | 20/24  | 0.3584    | 0.3584 | 3.7465  | UPSP:CUL7_HUMAN | 2               | R.MIQALSSHDAGTR.T          |                        |
| 1 1             | 4.236 | 0.00 | UPSP:HSP71_HUMAN  | 0639 | 1   | 2    | 11/14  | 0.2300    | 0.2300 | 1.9013  | UPSP:CUL7_HUMAN | 2               | R.QEONFADR.F               |                        |
| 1 1             | 4.035 | 0.00 | GP:BC022805_1     | 2351 | 1   | 2    | 24/30  | 0.4581    | 0.4581 | 4.7000  | UPSP:CUL7_HUMAN | 2               | R.OFHVYQLQQLDOELLK.L       |                        |
| 1 1             | 4.032 | 0.00 | UPTR:Q9NQSS_HUMAN | 1869 | 1   | 2    | 23/32  | 0.3992    | 0.3992 | 5.2884  | UPSP:CUL7_HUMAN | 7               | R.QLTLLVASEDSSYM*PAR.V     |                        |
| 1 1             | 4.032 | 0.00 | UPSP:RL9_HUMAN    | 2101 | 1   | 2    | 21/32  | 0.4481    | 0.4481 | 3.2710  | UPSP:CUL7_HUMAN | 7               | R.QLTLLVASEDSSYPAR.V       |                        |
| 1 1             | 3.983 | 0.00 | UPTR:Q5VVC8_HUMAN | 2307 | 1   | 2    | 16/36  | 0.5082    | 0.5082 | 3.5045  | UPSP:CUL7_HUMAN | 2               | R.QQPFLALM*OSLDTPETNR.T    |                        |
| 1 1             | 3.961 | 0.00 | UPSP:TCPH_HUMAN   | 2819 | 1   | 2    | 17/36  | 0.4491    | 0.4491 | 3.5926  | UPSP:CUL7_HUMAN | 2               | R.QQPFLALMQSLDTPETNR.T     |                        |
| 1 1             | 3.855 | 0.00 | UPSP:IF2B_HUMAN   | 2251 | 1   | 2    | 15/34  | 0.3576    | 0.3576 | 2.8875  | UPSP:CUL7_HUMAN | 2               | R.QSNNGVPPVQVFWESTGR.T     |                        |
| 1 1             | 3.853 | 0.00 | UPSP:RL7_HUMAN    | 1712 | 1   | 2    | 19/26  | 0.4180    | 0.4180 | 4.1807  | UPSP:CUL7_HUMAN | 2               | R.SEFASGNTYALYVR.D         |                        |
| 1 1             | 3.838 | 0.00 | UPSP:MUC2_HUMAN   | 1049 | 1   | 2    | 12/14  | 0.1570    | 0.1570 | 2.2688  | UPSP:CUL7_HUMAN | 2               | R.SLLHLSSRL                |                        |
| 1 1             | 3.791 | 0.00 | UPTR:Q7Z561_HUMAN | 2315 | 1   | 3    | 34/104 | 0.3650    | 0.3650 | 4.1854  | UPSP:CUL7_HUMAN | 2               | R.SPGSIFOPQLADVSPGLPAAQA   |                        |
| 1 1             | 3.478 | 0.00 | UPSP:EEG2_HUMAN   | 2761 | 1   | 3    | 30/56  | 0.3340    | 0.3340 | 4.2930  | UPSP:CUL7_HUMAN | 1               | R.THRPINIPFEDVFLR.Y        |                        |
| 1 1             | 3.458 | 0.00 | UPSP:G3PT_HUMAN   | 1337 | 1   | 2    | 11/14  | 0.0594    | 0.0594 | 1.5181  | UPSP:CUL7_HUMAN | 3               | R.TLHLTVLR.I               |                        |
| 1 1             | 3.339 | 0.00 | UPTR:Q8TCX0_HUMAN | 1911 | 1   | 2    | 22/28  | 0.2594    | 0.2594 | 4.4532  | UPSP:CUL7_HUMAN | 2               | R.TOILLSLSQEAIEK.H         |                        |
| 1 1             | 3.112 | 0.00 | UPSP:RL18_HUMAN   | 0727 | 1   | 2    | 16/22  | 0.3536    | 0.3536 | 3.1154  | UPSP:CUL7_HUMAN | 2               | R.VGDHGHPEYQIR.W           |                        |
|                 |       |      |                   | 1953 | 1   | 2    | 15/16  | 0.2437    | 0.2437 | 3.3498  | UPSP:CUL7_HUMAN | 2               | R.VILLENLTR.F              |                        |
|                 |       |      |                   | 2026 | 1   | 2    | 19/32  | 0.4069    | 0.4069 | 3.4539  | UPSP:CUL7_HUMAN | 2               | R.VLDLIM*HM*LSSPDYQIR.W    |                        |
|                 |       |      |                   | 2620 | 1   | 3    | 29/64  | 0.0758    | 0.0758 | 1.154   | 3.4372          | UPSP:CUL7_HUMAN | 2                          | R.VLDLIM*HMLSSPDYQIR.W |
|                 |       |      |                   | 2347 | 1   | 2    | 17/32  | 0.2741    | 0.2741 | 3.7826  | UPSP:CUL7_HUMAN | 2               | R.VLDLIM*HM*LSSPDYQIR.W    |                        |
|                 |       |      |                   | 1865 | 1   | 2    | 11/12  | 0.0605    | 0.0605 | 2.2046  | UPSP:CUL7_HUMAN | 2               | R.VLFLVLR.R                |                        |
|                 |       |      |                   | 1850 | 1   | 2    | 22/30  | 0.5251    | 0.5251 | 5.2466  | UPSP:CUL7_HUMAN | 2               | R.VPLGGLHAYPDELIR.Q        |                        |
|                 |       |      |                   | 0627 | 1   | 2    | 14/16  | 0.0504    | 0.0504 | 2.1469  | UPSP:CUL7_HUMAN | 2               | R.WDQASDRPR.S              |                        |
|                 |       |      |                   | 2262 | 1   | 3    | 48/128 | 0.5602    | 0.5602 | 6.9118  | UPSP:CUL7_HUMAN | 2               | R.YLHVTSLLDQLNDSAAEPGAQ    |                        |

|      |   |   |       |        |        |        |                  |    |                            |
|------|---|---|-------|--------|--------|--------|------------------|----|----------------------------|
| 2100 | 1 | 2 | 22/26 | 0.3391 | 0.3391 | 4.8429 | UPSP-PARC_HUMAN  | 6  | K.FNQTEEVSVETLLK.D         |
| 1974 | 1 | 2 | 25/32 | 0.2676 | 0.2676 | 5.3298 | UPSP-PARC_HUMAN  | 5  | K.M*LAVASSEIPTFVTGR.D      |
| 1819 | 1 | 2 | 22/24 | 0.4037 | 0.4037 | 4.9924 | UPSP-PARC_HUMAN  | 4  | K.M*LVELLTNQVGEK.M         |
| 2187 | 1 | 2 | 13/14 | 0.1602 | 0.1602 | 2.8758 | UPSP-PARC_HUMAN  | 5  | K.TLLLSVLR.V               |
| 2214 | 1 | 2 | 24/38 | 0.5601 | 0.5601 | 4.9680 | UPSP-PARC_HUMAN  | 5  | R.AALETPIHQGDGSPPELLIR.S   |
| 1172 | 1 | 2 | 14/16 | 0.2963 | 0.2963 | 3.3185 | UPSP-PARC_HUMAN  | 5  | R.AGSELEFGPR.A             |
| 2334 | 1 | 2 | 23/32 | 0.5442 | 0.5442 | 4.7618 | UPSP-PARC_HUMAN  | 6  | R.FEGSTLNDLLNSQIYTK.Y      |
| 2661 | 1 | 2 | 11/30 | 0.1313 | 0.1313 | 2.5466 | UPSP-PARC_HUMAN  | 5  | R.GVEVLGPKTFEWPFLR.E       |
| 1882 | 1 | 3 | 24/48 | 0.3203 | 0.3203 | 3.5379 | UPSP-PARC_HUMAN  | 6  | R.LLAILQHSADFR.V           |
| 1687 | 1 | 2 | 15/18 | 0.3530 | 0.3530 | 2.6559 | UPSP-PARC_HUMAN  | 5  | R.LQAYPEELIR.Q             |
| 2711 | 1 | 2 | 20/24 | 0.3291 | 0.3291 | 5.0947 | UPSP-PARC_HUMAN  | 5  | R.LQOETQPFLLLR.T           |
| 1809 | 1 | 2 | 12/16 | 0.0361 | 0.0361 | 1.6973 | UPSP-PARC_HUMAN  | 6  | R.QFHFLQQLR.L              |
| 2333 | 1 | 2 | 14/34 | 0.3397 | 0.3397 | 2.9030 | UPSP-PARC_HUMAN  | 4  | R.QSNNGIPPVQVFWQSTGR.T     |
| 2589 | 1 | 2 | 13/42 | 0.1831 | 0.1831 | 3.2526 | UPSP-PARC_HUMAN  | 5  | R.SGEALWLJPPQAYLNVEKDEGI   |
| 2881 | 1 | 3 | 33/84 | 0.4124 | 0.4124 | 4.8590 | UPSP-PARC_HUMAN  | 5  | R.SIFQPYISGPSLLPIVITVTPR.R |
| 2633 | 1 | 2 | 21/30 | 0.4106 | 0.4106 | 4.2923 | UPSP-PARC_HUMAN  | 5  | R.SLVGGPSAELLDDLDER.V      |
| 1335 | 1 | 2 | 18/26 | 0.4121 | 0.4121 | 3.2879 | UPSP-PARC_HUMAN  | 5  | R.SPAPSPVLPSSSLR.N         |
| 2911 | 1 | 3 | 29/56 | 0.3227 | 0.3227 | 3.4478 | UPSP-PARC_HUMAN  | 6  | R.THQPINIPFFDVFRL.H        |
| 2248 | 1 | 2 | 10/16 | 0.0766 | 0.0766 | 2.1461 | UPSP-PARC_HUMAN  | 5  | R.TILM*M*LLNR.Y            |
| 1677 | 1 | 2 | 18/26 | 0.4394 | 0.4394 | 4.2665 | UPSP-PARC_HUMAN  | 6  | R.VGLQSPVSEVAWEAK.G        |
| 2174 | 1 | 3 | 42/96 | 0.4362 | 0.4362 | 5.8289 | UPSP-PARC_HUMAN  | 5  | R.YIDQIQGGIGGAPGVFEM*LG    |
| 2518 | 1 | 2 | 24/44 | 0.6084 | 0.6084 | 5.1031 | UPSP-COA1_HUMAN  | 4  | K.IASSIVAQTAGIPTLPWSSGSLR  |
| 1169 | 1 | 2 | 17/20 | 0.3587 | 0.3587 | 3.4775 | UPSP-COA1_HUMAN  | 2  | K.LLLETESFQM*NR.I          |
| 2988 | 1 | 3 | 36/84 | 0.3926 | 0.3926 | 5.8721 | UPSP-COA1_HUMAN  | 2  | K.TLRDPSLPLLELQDIMITSVSGR  |
| 2048 | 1 | 2 | 19/24 | 0.3977 | 0.3977 | 4.0295 | UPSP-COA1_HUMAN  | 11 | R.DFTVASPAFFVTR.F          |
| 2677 | 1 | 2 | 14/22 | 0.2809 | 0.2809 | 2.3326 | UPSP-COA1_HUMAN  | 4  | R.EGLPLM*VFANWR.G          |
| 2468 | 1 | 2 | 21/30 | 0.2462 | 0.2462 | 4.8216 | UPSP-COA1_HUMAN  | 2  | R.EVFFM*NTQSVQVQYOR.Y      |
| 2287 | 1 | 2 | 28/38 | 0.4931 | 0.4931 | 5.5083 | UPSP-COA1_HUMAN  | 5  | R.FHGSVSEDNSEDEISNLVK.L    |
| 2531 | 1 | 2 | 20/36 | 0.6004 | 0.6004 | 4.9353 | UPSP-COA1_HUMAN  | 3  | R.FQAQSLGTTYDYDIPEM*FR.Q   |
| 1762 | 1 | 2 | 15/20 | 0.1824 | 0.1824 | 2.7586 | UPSP-COA1_HUMAN  | 8  | R.FVVM*VTPEDI.K.A          |
| 2674 | 1 | 3 | 30/88 | 0.4627 | 0.4627 | 4.8288 | UPSP-COA1_HUMAN  | 2  | R.GQVLPAAHTLLNTVDVVELIYEGV |
| 1437 | 1 | 2 | 15/24 | 0.2002 | 0.2002 | 2.4976 | UPSP-COA1_HUMAN  | 4  | R.GSVLEPEGTVEIK.F          |
| 2583 | 1 | 2 | 19/26 | 0.3954 | 0.3954 | 4.0987 | UPSP-COA1_HUMAN  | 4  | R.IGSFGPOEDLFLR.A          |
| 1730 | 1 | 2 | 16/20 | 0.2618 | 0.2618 | 3.2307 | UPSP-COA1_HUMAN  | 4  | R.IJLVNPQELYEK.G           |
| 1849 | 1 | 2 | 21/26 | 0.4457 | 0.4457 | 3.7010 | UPSP-COA1_HUMAN  | 4  | R.LGGIPVGVVAVETRT          |
| 2149 | 1 | 2 | 15/22 | 0.2176 | 0.2176 | 2.3478 | UPSP-COA1_HUMAN  | 2  | R.NSVSNFLHSLER.G           |
| 1703 | 1 | 2 | 22/28 | 0.4143 | 0.4143 | 4.4010 | UPSP-COA1_HUMAN  | 2  | R.QVQAEVPGSPFVVM*RL        |
| 0894 | 1 | 2 | 10/12 | 0.0982 | 0.0982 | 1.8971 | UPSP-COA1_HUMAN  | 3  | R.VLQAEIK.I                |
| 0589 | 1 | 2 | 13/18 | 0.1672 | 0.1672 | 2.4670 | UPSP-BRE1A_HUMAN | 7  | K.ASQEDANEIK.S             |
| 0946 | 1 | 2 | 19/24 | 0.3138 | 0.3138 | 3.1436 | UPSP-BRE1A_HUMAN | 4  | K.EHLLNSQNIERGEK.E         |
| 0796 | 1 | 2 | 13/14 | 0.1685 | 0.1685 | 2.9068 | UPSP-BRE1A_HUMAN | 8  | K.LAEM*LDOR.Q              |
| 1451 | 1 | 2 | 15/24 | 0.2550 | 0.2550 | 2.6223 | UPSP-BRE1A_HUMAN | 8  | K.LGGVSSTEELDIR.T          |
| 1732 | 1 | 2 | 21/32 | 0.3728 | 0.3728 | 5.6487 | UPSP-BRE1A_HUMAN | 4  | K.LLKKEKEFELADQVLT.LK.T    |
| 2208 | 1 | 2 | 21/30 | 0.4566 | 0.4566 | 4.5050 | UPSP-BRE1A_HUMAN | 15 | K.LRTEVIQLEDTLAQVR.K       |
| 2353 | 1 | 2 | 15/28 | 0.1177 | 0.1177 | 3.0928 | UPSP-BRE1A_HUMAN | 5  | K.RYDLEQGLGDLITER.K        |
| 1182 | 1 | 2 | 16/20 | 0.2993 | 0.2993 | 3.6372 | UPSP-BRE1A_HUMAN | 4  | K.TQVDAQLQVYR.K            |
| 1342 | 1 | 2 | 13/20 | 0.1326 | 0.1326 | 2.4132 | UPSP-BRE1A_HUMAN | 4  | R.AVEEQIEYLOK.K            |
| 0899 | 1 | 2 | 13/14 | 0.3036 | 0.3036 | 2.7533 | UPSP-BRE1A_HUMAN | 8  | R.HLAEVLER.V               |
| 1704 | 1 | 2 | 22/34 | 0.5526 | 0.5526 | 5.1598 | UPSP-BRE1A_HUMAN | 8  | R.IEFEQTLAANFQAGPINR.E     |
| 1576 | 1 | 2 | 21/24 | 0.3696 | 0.3696 | 3.5760 | UPSP-BRE1A_HUMAN | 8  | R.QATDDASLLIVNR.Y          |
| 2185 | 1 | 2 | 21/26 | 0.2503 | 0.2503 | 4.6004 | UPSP-BRE1A_HUMAN | 15 | R.TEVIQLEDTLAQVR.K         |
| 2666 | 1 | 2 | 21/26 | 0.3495 | 0.3495 | 5.0179 | UPSP-BRE1A_HUMAN | 5  | R.YDLEQGLGDLITER.K         |
| 0492 | 1 | 2 | 21/26 | 0.4249 | 0.4249 | 4.4292 | UPSP-P53_HUMAN   | 30 | K.KGEPHHELPPGSTK.R         |
| 1741 | 1 | 2 | 22/26 | 0.4959 | 0.4959 | 4.1969 | UPSP-P53_HUMAN   | 24 | K.KKPLDGEYFTLQIR.G         |
| 1931 | 1 | 2 | 20/24 | 0.2864 | 0.2864 | 3.8880 | UPSP-P53_HUMAN   | 24 | K.KPLDGEYFTLQIR.G          |
| 0594 | 1 | 2 | 20/26 | 0.2153 | 0.2153 | 3.4733 | UPSP-P53_HUMAN   | 28 | K.RALPNNTSSSPQPK.K         |
| 1047 | 1 | 2 | 12/16 | 0.2469 | 0.2469 | 1.9706 | UPSP-P53_HUMAN   | 27 | K.TYQGSYGFR.L              |
| 0647 | 1 | 2 | 19/24 | 0.3882 | 0.3882 | 2.5403 | UPSP-P53_HUMAN   | 28 | R.ALPNNTSSSPQPK.K          |
| 1368 | 1 | 2 | 14/16 | 0.1126 | 0.1126 | 2.4803 | UPSP-P53_HUMAN   | 25 | R.ELNEALELK.D              |
| 0284 | 1 | 3 | 24/56 | 0.2531 | 0.2531 | 3.3097 | UPSP-P53_HUMAN   | 30 | R.KKGEHHELPPGSTK.R         |
| 1027 | 1 | 2 | 17/18 | 0.2428 | 0.2428 | 3.2598 | UPSP-P53_HUMAN   | 26 | R.LGFLHSGTAK.S             |
| 2534 | 1 | 2 | 22/36 | 0.3437 | 0.3437 | 4.6797 | UPSP-P53_HUMAN   | 27 | R.RPILTIITLEDSSGNLLGR.N    |
| 0474 | 1 | 2 | 13/14 | 0.1311 | 0.1311 | 3.5412 | UPSP-P53_HUMAN   | 30 | R.RTEENLR.K                |
| 0565 | 1 | 2 | 11/12 | 0.0199 | 0.0199 | 2.2577 | UPSP-P53_HUMAN   | 30 | R.TEENLR.K                 |
| 0933 | 1 | 1 | 8/12  | 0.1539 | 0.1539 | 2.0828 | UPSP-P53_HUMAN   | 36 | R.VEYLLDDR.N               |
| 1643 | 1 | 2 | 18/22 | 0.3568 | 0.3568 | 3.3499 | UPSP-BRE1B_HUMAN | 8  | K.AVEAAQLAEDLK.V           |

|      |   |   |       |        |        |        |                  |    |                            |
|------|---|---|-------|--------|--------|--------|------------------|----|----------------------------|
| 1665 | 1 | 3 | 31/92 | 0.2686 | 0.2686 | 4.1513 | UPSP:BRE1B_HUMAN | 5  | K.KEELVPSEEDFOGITPGAQGPS:  |
| 1648 | 1 | 3 | 29/64 | 0.2997 | 0.2997 | 5.1328 | UPSP:BRE1B_HUMAN | 8  | K.LLREKDELGFQVLGLK.S       |
| 1043 | 1 | 2 | 13/18 | 0.2125 | 0.2125 | 2.6100 | UPSP:BRE1B_HUMAN | 6  | K.LQAELQGVAVR.T            |
| 1351 | 1 | 2 | 19/22 | 0.3180 | 0.3180 | 4.0733 | UPSP:BRE1B_HUMAN | 7  | K.SQVDAQLLTVQK.L           |
| 1406 | 1 | 2 | 13/18 | 0.1601 | 0.1601 | 2.2790 | UPSP:BRE1B_HUMAN | 5  | K.TTTITLEPIR.L             |
| 1728 | 1 | 2 | 21/30 | 0.4381 | 0.4381 | 3.7319 | UPSP:BRE1B_HUMAN | 6  | R.EGPSLGGPPVASALSR.A       |
| 1503 | 1 | 2 | 18/20 | 0.3797 | 0.3797 | 3.7795 | UPSP:BRE1B_HUMAN | 4  | R.ISLFEYSELQDK.V           |
| 2268 | 1 | 3 | 33/76 | 0.3968 | 0.3968 | 5.2969 | UPSP:BRE1B_HUMAN | 8  | R.KVEVYADADEILQEEIKEYK.A   |
| 1341 | 1 | 2 | 16/20 | 0.2731 | 0.2731 | 3.3607 | UPSP:BRE1B_HUMAN | 4  | R.LQDLATLQLEK.H            |
| 1653 | 1 | 2 | 18/24 | 0.2330 | 0.2330 | 2.7766 | UPSP:BRE1B_HUMAN | 4  | R.QATDDATLLIVNR.Y          |
| 2389 | 1 | 2 | 18/32 | 0.2824 | 0.2824 | 3.2441 | UPSP:MCCA_HUMAN  | 3  | K.AVNVYVAGTVFIMDSK.H       |
| 1994 | 1 | 2 | 13/22 | 0.3402 | 0.3402 | 2.2949 | UPSP:MCCA_HUMAN  | 3  | K.EGSEIDIPVVK.Y            |
| 1774 | 1 | 3 | 36/68 | 0.5230 | 0.5230 | 5.9785 | UPSP:MCCA_HUMAN  | 3  | K.IPLSQEITLQGHAFEAR.I      |
| 1280 | 1 | 2 | 17/28 | 0.2422 | 0.2422 | 3.2982 | UPSP:MCCA_HUMAN  | 2  | K.KLGVQTVAVYSEADR.N        |
| 2188 | 1 | 2 | 21/28 | 0.4840 | 0.4840 | 4.2179 | UPSP:MCCA_HUMAN  | 2  | K.QEGHIFGPPSAIR.D          |
| 1428 | 1 | 3 | 28/92 | 0.2136 | 0.2136 | 3.8117 | UPSP:MCCA_HUMAN  | 3  | K.YLSSVSSQEQGGPLAPM*TGT    |
| 2318 | 1 | 3 | 38/92 | 0.4524 | 0.4524 | 5.3943 | UPSP:MCCA_HUMAN  | 3  | R.IYAEFSPNFMFVAGPLVHLSI    |
| 2233 | 1 | 3 | 28/84 | 0.3082 | 0.3082 | 4.2630 | UPSP:MCCA_HUMAN  | 3  | R.LQVEHPVTEM*ITGTDLVEWQI   |
| 2540 | 1 | 3 | 28/84 | 0.3397 | 0.3397 | 3.8825 | UPSP:MCCA_HUMAN  | 3  | R.LQVEHPVTEMITGTDLVEWQI    |
| 1363 | 1 | 2 | 15/24 | 0.2854 | 0.2854 | 3.2955 | UPSP:MCCA_HUMAN  | 2  | R.SEQEQEQLESAR.R           |
| 2110 | 1 | 2 | 21/24 | 0.4837 | 0.4837 | 4.7499 | UPSP:MCCC2_HUMAN | -  | K.AFYGDILVTGFAR.I          |
| 1144 | 1 | 2 | 12/18 | 0.1855 | 0.1855 | 2.0368 | UPSP:MCCC2_HUMAN | 1  | K.GGAYYPVTVK.K             |
| 1483 | 1 | 2 | 18/30 | 0.4174 | 0.4174 | 3.8587 | UPSP:MCCC2_HUMAN | 1  | K.QFSSADEAALKEPIK.K        |
| 1805 | 1 | 2 | 11/12 | 0.2501 | 0.2501 | 2.3661 | UPSP:MCCC2_HUMAN | 1  | K.TDFGIFR.M                |
| 2275 | 1 | 2 | 11/16 | 0.0573 | 0.0573 | 2.2997 | UPSP:MCCC2_HUMAN | -  | R.FLYWPNAR.I               |
| 2587 | 1 | 2 | 26/40 | 0.6509 | 0.6509 | 5.2690 | UPSP:MCCC2_HUMAN | -  | R.IFGYVGVGVGNVGFSESAC.K    |
| 2156 | 1 | 2 | 26/34 | 0.4899 | 0.4899 | 5.6998 | UPSP:MCCC2_HUMAN | 1  | R.ISVM*GGEQAANVLATITK.D    |
| 2457 | 1 | 2 | 23/34 | 0.4895 | 0.4895 | 5.7545 | UPSP:MCCC2_HUMAN | 1  | R.ISVMGGEQAANVLATITK.D     |
| 1784 | 1 | 2 | 20/24 | 0.4001 | 0.4001 | 4.2929 | UPSP:MCCC2_HUMAN | 1  | R.VWDDGHDPADTR.L           |
| 2107 | 1 | 2 | 21/44 | 0.5074 | 0.5074 | 3.4224 | UPSP:PYC_HUMAN   | 2  | K.ASPSPDTPVPAVPIGPPAPGER   |
| 2355 | 1 | 2 | 16/28 | 0.4873 | 0.4873 | 3.6100 | UPSP:PYC_HUMAN   | 2  | K.DFTATFGLDSLNTR.L         |
| 1518 | 1 | 2 | 22/26 | 0.4145 | 0.4145 | 4.7832 | UPSP:PYC_HUMAN   | 2  | R.AEAQAQAEELSFPR.S         |
| 0882 | 1 | 2 | 17/18 | 0.0863 | 0.0863 | 2.0370 | UPSP:PYC_HUMAN   | 2  | R.DAHOSSLATR.V             |
| 2760 | 1 | 2 | 18/24 | 0.4290 | 0.4290 | 3.1472 | UPSP:PYC_HUMAN   | 1  | R.ELIPNPFQM*ILR.G          |
| 2904 | 1 | 2 | 15/24 | 0.2529 | 0.2529 | 2.5493 | UPSP:PYC_HUMAN   | 1  | R.ELIPNPFQMLLR.G           |
| 1315 | 1 | 2 | 14/18 | 0.1215 | 0.1215 | 1.9974 | UPSP:PYC_HUMAN   | 2  | R.FIGSPFVVR.K              |
| 1729 | 1 | 2 | 20/32 | 0.4933 | 0.4933 | 4.4194 | UPSP:PYC_HUMAN   | 2  | R.GANAVGYTNYPDNVVFK.F      |
| 2777 | 1 | 3 | 26/84 | 0.3297 | 0.3297 | 3.5389 | UPSP:PYC_HUMAN   | 2  | R.SVVEFLQGYIGVPHGGFPEPR.   |
| 1630 | 1 | 2 | 17/18 | 0.3594 | 0.3594 | 3.5652 | UPSP:FBXW8_HUMAN | 1  | K.ILVYSLEAGR.R             |
| 2270 | 1 | 2 | 19/30 | 0.3907 | 0.3907 | 3.3251 | UPSP:FBXW8_HUMAN | 1  | K.IVSGGEEGLVSVWDYR.M       |
| 2025 | 1 | 2 | 19/22 | 0.3387 | 0.3387 | 3.2658 | UPSP:FBXW8_HUMAN | 1  | K.LVQYLEIVPETR.I           |
| 2019 | 1 | 2 | 18/20 | 0.3763 | 0.3763 | 3.3645 | UPSP:FBXW8_HUMAN | 5  | K.VIAEDEVLYWR.L            |
| 2045 | 1 | 2 | 22/28 | 0.2990 | 0.2990 | 4.4527 | UPSP:FBXW8_HUMAN | -  | R.EGAGGGEQLVDQLIR.D        |
| 1074 | 1 | 2 | 18/20 | 0.2797 | 0.2797 | 3.3050 | UPSP:FBXW8_HUMAN | 1  | R.NADLDSFTTHR.R            |
| 1462 | 1 | 2 | 15/26 | 0.2783 | 0.2783 | 3.3211 | UPSP:FBXW8_HUMAN | 1  | R.SGNIALSLSAHQLR.V         |
| 2232 | 1 | 2 | 21/26 | 0.4587 | 0.4587 | 4.1030 | UPSP:PCCB_HUMAN  | 6  | K.DTSYLHITGPDVVK.S         |
| 1883 | 1 | 2 | 19/42 | 0.0397 | 0.0397 | 2.8668 | UPSP:PCCB_HUMAN  | 5  | K.IM*DAQAITVGAPVIGLNDSSGGA |
| 1061 | 1 | 2 | 21/30 | 0.4198 | 0.4198 | 4.9663 | UPSP:PCCB_HUMAN  | 6  | K.SVTNEDVTOEELGGAK.T       |
| 2839 | 1 | 2 | 24/32 | 0.5356 | 0.5356 | 5.8119 | UPSP:PCCB_HUMAN  | 6  | R.IQEGVESLAGYADIFLR.N      |
| 1894 | 1 | 2 | 20/22 | 0.2659 | 0.2659 | 3.8074 | UPSP:HSP7C_HUMAN | 4  | K.DAGTIAGLNVLRI            |
| 1840 | 1 | 2 | 21/26 | 0.4605 | 0.4605 | 3.7092 | UPSP:HSP7C_HUMAN | 4  | K.SFYPEEVSSM*VLT.K.M       |
| 2716 | 1 | 2 | 25/44 | 0.5891 | 0.5891 | 5.4449 | UPSP:HSP7C_HUMAN | 4  | K.SINPDEAVAYGAAVQAAILSGI   |
| 1900 | 1 | 2 | 23/34 | 0.3810 | 0.3810 | 4.2849 | UPSP:HSP7C_HUMAN | 4  | K.TVTINAVVTVPAVFNDSOR.Q    |
| 2049 | 1 | 2 | 22/28 | 0.5366 | 0.5366 | 4.5951 | UPSP:PCCA_HUMAN  | 2  | K.VVEEAPSIFLDAETR.R        |
| 1667 | 1 | 3 | 25/52 | 0.2501 | 0.2501 | 3.0198 | UPSP:PCCA_HUMAN  | 3  | R.I.SQYQEPHLPGVR.V         |
| 1600 | 1 | 2 | 15/20 | 0.3208 | 0.3208 | 3.1775 | UPSP:PCCA_HUMAN  | 4  | R.M*ADALDNYVIR.G           |
| 2003 | 1 | 3 | 27/60 | 0.0005 | 0.0005 | 3.4776 | UPSP:PCCA_HUMAN  | 5  | R.M*PVIKPDIANWELSVK.L      |
| 2076 | 1 | 2 | 15/26 | 0.2393 | 0.2393 | 2.3419 | UPSP:HS70L_HUMAN | 15 | K.AFYPEISSM*VLT.K.L        |
| 2094 | 1 | 2 | 15/22 | 0.2268 | 0.2268 | 2.8966 | UPSP:HS70L_HUMAN | 15 | K.DAGVIAGLNVLRI            |
| 2698 | 1 | 2 | 13/44 | 0.4081 | 0.4081 | 2.9671 | UPSP:HS70L_HUMAN | 15 | K.SINPDEAVAYGAAVQAAILM*G   |
| 1459 | 1 | 2 | 18/24 | 0.4309 | 0.4309 | 3.5593 | UPSP:HS70L_HUMAN | 27 | R.TTPSYVAFTDTER.L          |
| 2058 | 1 | 2 | 19/26 | 0.4227 | 0.4227 | 3.8537 | UPSP:NUCL_HUMAN  | 7  | K.GFGFVDFNSEEDAK.A         |
| 2857 | 1 | 2 | 25/42 | 0.4911 | 0.4911 | 5.9118 | UPSP:NUCL_HUMAN  | 6  | K.TLVLNLSYSATETLQEVFEK     |
| 2792 | 1 | 2 | 23/40 | 0.5780 | 0.5780 | 5.2820 | UPSP:NUCL_HUMAN  | 5  | K.VEGTEPTTAFNLFVGNLFNK.    |
| 1938 | 1 | 2 | 16/18 | 0.2873 | 0.2873 | 3.6891 | UPSP:RLA0_HUMAN  | 6  | K.IIQLDDYYPK.C             |
| 0706 | 1 | 2 | 14/20 | 0.3366 | 0.3366 | 2.4440 | UPSP:RLA0_HUMAN  | 6  | R.GHLENNPALEK.L            |



|      |   |   |        |        |        |        |                   |    |                            |
|------|---|---|--------|--------|--------|--------|-------------------|----|----------------------------|
| 2472 | 1 | 2 | 21/32  | 0.5052 | 0.5052 | 5.5043 | UPSP:RLA0_HUMAN   | 7  | R.VLALSIVETDITFPLAEK.V     |
| 2266 | 1 | 2 | 22/30  | 0.4192 | 0.4192 | 5.0809 | UPTR:Q59FY4_HUMAN | 3  | K.IIQOAGQVWFPDSAFK.T       |
| 1904 | 1 | 2 | 19/26  | 0.1171 | 0.1171 | 2.4930 | UPTR:Q59FY4_HUMAN | 3  | R.GGSWVVIDSSINPR.H         |
| 1901 | 1 | 2 | 22/34  | 0.2880 | 0.2880 | 3.5641 | UPTR:Q59FY4_HUMAN | 3  | R.TVELSIPADPANLDESEAK.I    |
| 0798 | 1 | 2 | 11/16  | 0.1888 | 0.1888 | 2.3522 | UPSP:NPM_HUMAN    | 18 | K.GPSSVEDIK.A              |
| 2689 | 1 | 2 | 23/40  | 0.6239 | 0.6239 | 4.6132 | UPSP:NPM_HUMAN    | 20 | R.M*SVQPTVSLGGFEITPPVVL.R  |
| 2533 | 1 | 2 | 19/26  | 0.2970 | 0.2970 | 3.9932 | UPSP:NPM_HUMAN    | 11 | R.M*TDQEAIQDLWQWR.K        |
| 0640 | 1 | 2 | 19/24  | 0.3327 | 0.3327 | 4.6123 | UPSP:DECR_HUMAN   | 2  | K.ATAEQISSQTGNK.V          |
| 1482 | 1 | 2 | 16/24  | 0.1156 | 0.1156 | 2.5887 | UPSP:DECR_HUMAN   | 2  | K.VAFITGGGTGLGK.G          |
| 1692 | 1 | 3 | 27/84  | 0.3211 | 0.3211 | 3.6761 | UPSP:DECR_HUMAN   | 2  | K.VAGHPNIVINNAAGNFISPTER.  |
| 0922 | 1 | 2 | 13/14  | 0.1143 | 0.1143 | 2.3145 | GP:M66870_1       | -  | R.FDGTVEVK.D               |
| 0982 | 1 | 2 | 22/28  | 0.3936 | 0.3936 | 3.9822 | GP:M66870_1       | -  | R.GASQNIIPSSTGAAK.A        |
| 1924 | 1 | 2 | 21/26  | 0.4195 | 0.4195 | 4.1809 | GP:M66870_1       | -  | R.VPTPNVSVVDLTVRL          |
| 1890 | 1 | 3 | 29/72  | 0.2315 | 0.2315 | 3.4752 | UPTR:Q53EN9_HUMAN | 6  | K.HSSDASSLLPQNLSQTSR.H     |
| 2360 | 1 | 2 | 19/38  | 0.4075 | 0.4075 | 4.3969 | UPTR:Q53EN9_HUMAN | 6  | K.INEVLTAAAVTQASLQSIH.H    |
| 0789 | 1 | 2 | 12/20  | 0.1137 | 0.1137 | 2.0907 | UPTR:Q53EN9_HUMAN | 2  | R.RGDSQPQOALK.Y            |
| 2773 | 1 | 2 | 22/30  | 0.2324 | 0.2324 | 3.9932 | UPSP:TCPE_HUMAN   | 3  | K.LGFAGLVQFISFGTK.D        |
| 2875 | 1 | 2 | 18/32  | 0.4420 | 0.4420 | 4.0095 | UPSP:TCPE_HUMAN   | 3  | R.WVGGPELLEIAIATGGR.I      |
| 0949 | 1 | 2 | 18/30  | 0.3473 | 0.3473 | 3.7787 | UPSP:HSP72_HUMAN  | 8  | K.STAGDTHLGGEDFDNR.M       |
| 1903 | 1 | 3 | 23/44  | 0.2137 | 0.2137 | 4.0527 | UPSP:HSP72_HUMAN  | 7  | R.ARFEELNADLFR.G           |
| 2811 | 1 | 2 | 18/24  | 0.4370 | 0.4370 | 3.8651 | UPSP:RS2_HUMAN    | 7  | K.SLEEIYLFSLPIK.E          |
| 2211 | 1 | 2 | 14/20  | 0.4109 | 0.4109 | 2.9228 | UPSP:RS2_HUMAN    | 8  | K.TYSYLPDILWK.E            |
| 2548 | 1 | 3 | 32/84  | 0.3385 | 0.3385 | 5.3337 | UPSP:HNRPU_HUMAN  | 9  | K.EKPYFPIPEEYTFIQNVPLEDRA  |
| 1986 | 1 | 2 | 25/30  | 0.0119 | 0.0119 | 5.1561 | UPSP:GRP78_HUMAN  | 18 | R.IINEPTAAAIAAYGLDK.R      |
| 2405 | 1 | 2 | 22/28  | 0.3826 | 0.3826 | 4.6294 | UPSP:TBA6_HUMAN   | 8  | R.AVFVDLEPTVIDEVR.T        |
| 1893 | 1 | 3 | 32/60  | 0.4303 | 0.4303 | 4.5035 | UPSP:RL4_HUMAN    | 3  | K.APIRPDIVNFVHTNLR.K       |
| 1720 | 1 | 3 | 28/96  | 0.3142 | 0.3142 | 4.3642 | UPTR:Q96FW6_HUMAN | 8  | R.ISTPQNTVPIKPLISTPPVSSQPI |
| 1432 | 1 | 2 | 18/24  | 0.3204 | 0.3204 | 4.2556 | UPSP:COA2_HUMAN   | 9  | K.EASEFEYLQNEGER.L         |
| 2022 | 1 | 2 | 23/30  | 0.4136 | 0.4136 | 4.2360 | UPSP:HSP71_HUMAN  | 9  | R.IINEPTAAAIAAYGLDR.T      |
| 1101 | 1 | 2 | 22/28  | 0.2959 | 0.2959 | 4.0354 | GP:BC022805_1     | 1  | K.GTAAAAAIAAIAAIAA.K       |
| 2083 | 1 | 3 | 25/84  | 0.3031 | 0.3031 | 4.0322 | UPTR:Q9NQ88_HUMAN | 5  | K.FVDGLM*IHSGDPVNYVYVDTA   |
| 2203 | 1 | 2 | 20/36  | 0.4141 | 0.4141 | 4.0315 | UPSP:RL9_HUMAN    | 1  | K.TILSNQTVDPENVDITL.K      |
| 1713 | 1 | 2 | 20/26  | 0.3716 | 0.3716 | 3.9831 | UPTR:Q5VVCS_HUMAN | 8  | K.VLEQLTGQTPVFSK.A         |
| 2027 | 1 | 2 | 22/34  | 0.4536 | 0.4536 | 3.9612 | UPSP:TCPH_HUMAN   | 3  | K.VQGGALSDSQLVAGVAFK.K     |
| 2381 | 1 | 2 | 21/28  | 0.3859 | 0.3859 | 3.8553 | UPSP:IF2B_HUMAN   | 4  | K.DASDDLDLNFENQK.K         |
| 2385 | 1 | 2 | 18/26  | 0.4023 | 0.4023 | 3.8533 | UPSP:RL7_HUMAN    | 7  | R.IVEPYIAWGYPNLK.S         |
| 2000 | 1 | 3 | 27/76  | 0.2011 | 0.2011 | 3.8384 | UPSP:MUC2_HUMAN   | 1  | R.EVGQYLVVESSTGHIVWDK.R    |
| 2563 | 1 | 3 | 31/108 | 0.3080 | 0.3080 | 3.7911 | UPTR:Q7Z561_HUMAN | 3  | K.M*ADHYVPVPGGPNNNNYAN'    |
| 2073 | 1 | 3 | 28/68  | 0.3904 | 0.3904 | 3.4785 | UPSP:EF2_HUMAN    | 3  | R.VNLIDTPGHVDFITLIVER.C    |
| 1616 | 1 | 2 | 16/20  | 0.1198 | 0.1198 | 3.4583 | UPSP:G3PT_HUMAN   | 4  | K.GALIALNDNFVK.L           |
| 2255 | 1 | 2 | 16/24  | 0.4014 | 0.4014 | 3.3386 | UPTR:Q8TCX0_HUMAN | .  | K.GQSLQDPFLNALR.R          |
| 2253 | 1 | 2 | 17/24  | 0.2877 | 0.2877 | 3.1118 | UPSP:RL18_HUMAN   | 3  | K.ILITFDQLALDSPK.G         |

**Supplementary Table S3. Primer sequences for ChIP-qPCR analysis of the *p21* locus.**

| Position                                           | Forward Primer           | Reverse Primer             |
|----------------------------------------------------|--------------------------|----------------------------|
| <i>P21-1</i> in Figure3                            | AGCAGGCTGTGGCTCTGATT     | CAAATAGCCACCAGCCTCTTCT     |
| <i>P21-2</i> in Figure3                            | CTGTCCTCCCCGAGGTCA       | ACATCTCAGGCTGCTCAGAGTCT    |
| <i>P21-3</i> in Figure3<br><i>P21-1</i> in Figure6 | TATATCAGGGCCGCGCTG       | GGCTCCACAAGGAACTGACTTC     |
| <i>P21-4</i> in Figure3<br><i>P21-2</i> in Figure6 | CCAGGAAGGGCGAGGAAA       | GGGACCGATCCTAGACGAACTT     |
| <i>P21-5</i> in Figure3<br><i>P21-3</i> in Figure6 | AGCCGGAGTGGAAGCAGA       | AGTGATGAGTCAGTTTCCTGCAAG   |
| <i>P21-6</i> in Figure3<br><i>P21-4</i> in Figure6 | CCAGGGCTGCGATTAGGAA      | GTGTCCCTCAGGGTGTGAAT       |
| <i>P21-5</i> in Figure6                            | ACCCCCTTTCCTGGACACTC     | GTCACCCTGCCCAACCTTAG       |
| <i>P21-7</i> in Figure3<br><i>P21-6</i> in Figure6 | CCTCCCACAATGCTGAATATACAG | AGTCACTAAGAATCATTATTGAGCAC |

**Supplementary Table S4. Primer sequences for ChIP-qPCR analysis of the *PUMA* locus.**

| Position                                                 | Forward Primer        | Reverse Primer        |
|----------------------------------------------------------|-----------------------|-----------------------|
| <i>PUMA-1</i> in Figure S4                               | TCAGTGTGTGTGTCGACTGTC | GGCAGGGCCTAGCCCA      |
| <i>PUMA-2</i> in Figure S4<br><i>PUMA-1</i> in Figure S7 | GCCCTCCTGAAGGAAGCC    | GCCTGCACTCCTGTCACCT   |
| <i>PUMA-3</i> in Figure S4<br><i>PUMA-2</i> in Figure S7 | GTGGAGTCTGCGGCTCCT    | CCAATAACCGGCTGTTGC    |
| <i>PUMA-4</i> in Figure S4<br><i>PUMA-3</i> in Figure S7 | GTTGCTGACAGTTGGTGATGA | ACATGCCATCAGACCTCAACA |
| <i>PUMA-5</i> in Figure S4<br><i>PUMA-4</i> in Figure S7 | AGGTGCTGCTCCGCCA      | CCCTCTGCCTCTCCAAGGTC  |
| <i>PUMA-6</i> in Figure S4<br><i>PUMA-5</i> in Figure S7 | GAAGTCCCACCTGCCGTCTA  | GGACGACCTCAACGCACAGT  |

**Supplementary Table S5. Primer sequences for RT-PCR analysis of *p21* mature and pre-mRNA expression.**

| Gene                   | Forward Primer           | Reverse Primer              |
|------------------------|--------------------------|-----------------------------|
| <i>p21</i> pre-mRNA    | TGAGGTGACACAGCAAAGCC     | GCCATTAGCGCATCACAGTC        |
| <i>p21</i> mature mRNA | CCTCCCACAATGCTGAATATACAG | AGTCACTAAGAATCATTTATTGAGCAC |
| <i>GAPDH</i>           | ACCCACTCCTCCACCTTTGA     | CTGTTGCTGTAGCCAAATTCGT      |

**Supplementary Table S6. Primer sequences for RT-PCR analysis of *PUMA* mature and pre-mRNA expression.**

| Gene                    | Forward Primer       | Reverse Primer         |
|-------------------------|----------------------|------------------------|
| <i>PUMA</i> pre-mRNA    | AGGATAGGTTGCAGTCCATC | CTCATCCAGGACATGAGAC    |
| <i>PUMA</i> mature-mRNA | CAATCTCATCATGGGACTCC | GTCCAGTATGCTACATGGTG   |
| <i>GAPDH</i>            | ACCCACTCCTCCACCTTTGA | CTGTTGCTGTAGCCAAATTCGT |
